1 **Main Document with Figures and Tables**

2

3 **Integrative analysis of the salt stress response in cyanobacteria**

4

5 Stephan Klähn<sup>1,2\*</sup>, Stefan Mikkat<sup>3\*</sup>, Matthias Riediger<sup>2</sup>, Jens Georg<sup>2</sup>, Wolfgang R. Hess<sup>2</sup>,  
6 Martin Hagemann<sup>4,5,A</sup>

7 1 - Helmholtz-Centre for Environmental Research - UFZ, Department of Solar Materials,  
8 Leipzig, Germany

9 2 - University of Freiburg, Faculty of Biology, Genetics and Experimental Bioinformatics,  
10 Freiburg, Germany

11 3 - Core Facility Proteome Analysis, Rostock University Medical Center, Rostock, Germany

12 4 - University of Rostock, Institute of Biosciences, Dept. Plant Physiology, Rostock, Germany

13 5 - Department Life, Light & Matter, University of Rostock, Rostock, Germany

14

15 \* The first two authors contributed equally to this study.

16

17 A - corresponding author: Universität Rostock, Institut für Biowissenschaften, Abt.  
18 Pflanzenphysiologie, A.-Einstein-Str. 3, D-18059 Rostock, Germany, Tel. +49(0)3814986110,  
19 Fax. +49(0)3814986112, Email. [martin.hagemann@uni-rostock.de](mailto:martin.hagemann@uni-rostock.de)

20

21 **Running title:** Salt acclimation of cyanobacteria

22

23 SK: [stephan.klaehn@ufz.de](mailto:stephan.klaehn@ufz.de); orcid: 0000-0002-2933-486X

24 SM: [stefan.mikkat@med.uni-rostock.de](mailto:stefan.mikkat@med.uni-rostock.de)

25 MR: [matthias.riediger@biologie.uni-freiburg.de](mailto:matthias.riediger@biologie.uni-freiburg.de)

26 JG: [jens.georg@biologie.uni-freiburg.de](mailto:jens.georg@biologie.uni-freiburg.de); orcid: 0000-0002-7746-5522

27 WRH: [wolfgang.hess@biologie.uni-freiburg.de](mailto:wolfgang.hess@biologie.uni-freiburg.de); orcid: 0000-0002-5340-3423

28 MH: [martin.hagemann@uni-rostock.de](mailto:martin.hagemann@uni-rostock.de); orcid: 0000-0002-2059-2061

29

## 30 **Abstract**

31 Microorganisms evolved specific acclimation strategies to thrive in environments of high or  
32 fluctuating salinities. Here, salt acclimation in the model cyanobacterium *Synechocystis* sp.  
33 PCC 6803 was analyzed by integrating transcriptomic, proteomic and metabolomic data. A  
34 dynamic reorganization of the transcriptome and proteome occurred during the first hours  
35 after salt shock, e.g. involving the upregulation of genes to activate compatible solute  
36 biochemistry balancing osmotic pressure. The massive accumulation of glucosylglycerol then  
37 had a measurable impact on the overall carbon and nitrogen metabolism. In addition, we  
38 observed the coordinated induction of putative regulatory RNAs and of several proteins  
39 known for their involvement in other stress responses. Overall, salt-induced changes in the  
40 proteome and transcriptome showed good correlations, especially among the stably up-  
41 regulated proteins and their transcripts. We define an extended salt stimulon comprising  
42 proteins directly or indirectly related to compatible solute metabolism, ion and water  
43 movements, and a distinct set of regulatory RNAs involved in post-transcriptional regulation.  
44 Our comprehensive data set provides the basis for engineering cyanobacterial salt tolerance  
45 and to further understand its regulation.

46

## 47 **Key words**

48 compatible solute/ ion transport/ regulatory RNAs/ transcriptome-proteome correlation/  
49 salinity stress response

## 50 **Introduction**

51 Salinity is a prominent environmental factor determining the natural distribution of  
52 microorganisms, as approximately 97% of the water resources contain more than 30 g salt  
53 (mainly sodium chloride) per liter. Accordingly, the capability of microorganisms to cope with  
54 high or changing salinities is crucial, not only in aquatic environments but also in terrestrial  
55 habitats, in which the alternation between evaporation and rainfall can rapidly change salt  
56 concentrations. In a hypersaline environment, in which the external salt concentration  
57 exceeds the cellular ion content, microorganisms have to manage two major challenges: (i)  
58 the low external water potential results in water loss from the cell and collapse of turgor  
59 pressure, and (ii) inorganic ions permeate into cells along the electrochemical gradient,  
60 which could compromise the structure of critical macromolecules. Accordingly, most  
61 microorganisms feature acclimation strategies aiming at maintaining a high water and low  
62 inorganic ion content in the cell. This so-called “salt-out” strategy is based on the active  
63 extrusion of inorganic ions accompanied by the accumulation of compatible solutes, i.e.

64 highly soluble, non-toxic, low molecular-mass organic compounds, for osmotic equilibrium  
65 (e.g., Hagemann, 2011).

66 Cyanobacteria are a morphologically and physiologically diverse group of photoautotrophic  
67 bacteria that are found in nearly all light-exposed habitats including environments with  
68 different salinities such as freshwaters, oceans, and hypersaline ponds or soil surfaces in  
69 temperate and arid climates (Whitton and Potts, 2000). Previous studies of cyanobacterial  
70 salt tolerance revealed that those with low salt tolerance, mainly freshwater and soil  
71 cyanobacteria, accumulate the sugars sucrose and/or trehalose, those with moderate  
72 tolerance (mainly marine strains) synthesize the heteroside glucosylglycerol (GG), whereas  
73 halophilic strains (found in hypersaline habitats) usually contain glycine betaine (Reed et al.,  
74 1986; Hagemann, 2011). Some deviations from these preferences have been documented  
75 as well (e.g., Klähn et al., 2010a; Pade et al., 2012, 2016).

76 Cyanobacterial salt acclimation has been investigated in great detail using the model strain  
77 *Synechocystis* sp. PCC 6803 (*Synechocystis* 6803). This unicellular strain was originally  
78 isolated from a freshwater pond (Stanier et al., 1971). Nevertheless, *Synechocystis* 6803  
79 represents a truly euryhaline organism able to grow in freshwater but also in media  
80 containing salt concentrations twice as high as in seawater (Reed and Stewart, 1985). The  
81 early availability of both, genetic tools (Grigorieva and Shestakov, 1982) and the complete  
82 genome sequence (Kaneko et al., 1996) established *Synechocystis* 6803 as  
83 photoautotrophic model organism. Using this strain, the molecular basis of salt-induced GG  
84 synthesis has been characterized, which is performed by the enzymes GG-phosphate  
85 synthase and GG-phosphate phosphatase, encoded by the genes *ggsS* (*sll1566*) and *ggsP*  
86 (*stpA*, *slr0746*), respectively (Hagemann et al., 1997; Marin et al., 1998). Today,  
87 *Synechocystis* 6803 is the best investigated photoautotrophic prokaryote represented by  
88 more than 3700 scientific publications, and has become popular as chassis for the  
89 introduction of pathways for the photosynthetic production of biofuels or chemical feedstock  
90 (e.g., Hagemann and Hess, 2018; Liu et al., 2019a). Salt-tolerant cyanobacterial strains such  
91 as *Synechocystis* 6803 also permit large scale cultivations in saline waters making the  
92 process more sustainable by avoiding competition for limited freshwater resources (Chisti,  
93 2013).

94 Over the past two decades, omics technologies have been applied to study salt acclimation  
95 of cyanobacteria, particularly *Synechocystis* 6803. Genome-wide transcriptome analyses  
96 revealed the differential expression of hundreds of genes after sudden increases in the  
97 external salinity and allowed the identification of several potential regulatory proteins involved  
98 in their stress-induced expression (Kanesaki et al., 2002; Marin et al., 2003; Shoumskaya et  
99 al., 2005). However, most of these genes were only transiently induced or repressed. In long-

100 term salt-acclimated cells, the expression of only 39 genes remained significantly enhanced  
101 (Marin et al., 2004). Later on, 2D-gel-based proteomics displayed a snapshot of the salt-  
102 regulated proteome, which identified 45 stably salt-induced soluble proteins (Fulda et al.,  
103 2006), while 20 proteins of the membrane fraction appeared to be salt-regulated (Huang et  
104 al., 2006). In the meantime, advanced omics technologies such as different RNA-seq  
105 technologies were established, which, for example, revealed that also large numbers of non-  
106 protein-coding RNAs (ncRNAs) are transcribed in *Synechocystis* 6803 (Mitschke et al., 2011;  
107 Kopf et al., 2014; Billis et al., 2014). Among them, two classes can be differentiated, cis-  
108 encoded antisense RNAs (asRNAs) transcribed from the opposite strand within protein-  
109 coding genes, and trans-encoded small regulatory RNAs (sRNAs) (Kopf and Hess, 2015;  
110 Georg and Hess, 2018). Some of the newly annotated asRNAs were demonstrated to act as  
111 regulators of their cognate mRNAs (Dühring et al., 2006; Sakurai et al., 2012) or sRNAs  
112 functioning in the acclimation response to changing environmental conditions (Georg et al.,  
113 2014, 2017; Klähn et al., 2015; Zhan et al., 2021). Moreover, tremendous progress has been  
114 made in the investigation of cyanobacteria using gel-free technologies for proteomics  
115 (Wegener et al., 2010; Gao et al., 2015a; Spät et al., 2021) or metabolomics (reviewed by  
116 Schwarz et al., 2013).

117 Here, we combined transcriptomic with proteomic and metabolomic approaches for a  
118 comprehensive characterization of the salt acclimation process in *Synechocystis* 6803.  
119 Previous studies (e.g., Marin et al., 2004; Fulda et al., 2006) showed that salt acclimation is a  
120 highly dynamic process, in which many genes/proteins showed an early but mostly transient  
121 response before long-term salt acclimation leads to stable, physiological meaningful changes  
122 in the gene/protein expression pattern. Therefore, we sampled *Synechocystis* 6803 cells at  
123 different time points up to 7 days after transfer from NaCl-free into medium containing 684  
124 mM NaCl (equal to 4% NaCl). In addition to many salt-regulated proteins and their  
125 corresponding mRNAs, we identified several potentially regulatory asRNAs and sRNAs to be  
126 salt-stimulated as well. Finally, metabolomics revealed that the massive accumulation of the  
127 compatible solute GG has a broader impact on the overall primary carbon and nitrogen  
128 metabolism.

## 129 **Results**

130 The response of *Synechocystis* 6803 to NaCl-induced hyperosmotic conditions (salt stress)  
131 was analyzed on transcriptome, proteome and metabolome levels at different time scales  
132 (Fig. 1). Changes in the expression profiles were first analyzed at a global scale. Then,  
133 selected examples were examined in a comprehensive way using all data sets.

## 134 **Global transcriptome analysis**

135 In the present study a microarray platform was used to detect RNA levels directly, without  
136 reverse transcription. This microarray contained probes for all protein-coding genes also  
137 covering so far non-annotated open reading frames as well as for ncRNAs such as cis-acting  
138 asRNAs and trans-acting sRNAs previously identified in *Synechocystis* 6803 (Mitschke et al.,  
139 2011; Kopf et al., 2014). In total the microarray covered 3364 mRNAs, 1940 asRNAs and  
140 602 sRNA candidates. Previous studies analyzing the salt transcriptome of *Synechocystis*  
141 6803 used DNA microarrays only covering 3079 mRNAs and no ncRNAs (Marin et al., 2004).  
142 Here, the microarray was hybridized with total RNA extracted from control cells (0% NaCl)  
143 and from cells exposed to 4% of NaCl for 0.5, 2, and 24 h. The time points were chosen to  
144 permit comparison with previously published microarray data (Marin et al., 2004). Gene  
145 expression changes along the *Synechocystis* 6803 chromosome are shown in the Suppl.  
146 Genome Plots.

147 For the selection of differentially expressed genes, we applied typical cut-off criteria, i.e.  $\log_2$   
148 fold change  $\geq |1|$ ,  $p$ -value  $< 0.05$ . As the transcriptome composition was highly dynamic at  
149 the different time points, we first focused on protein coding genes (mRNAs). Compared to  
150 control conditions (i.e., cells grown in NaCl-free BG11 medium), several hundred mRNAs  
151 showed a changed abundance 0.5 and 2 h after salt addition, while after 24 h only 87 were  
152 up- and 31 down-regulated (Table 1; volcano plots of transcriptional changes are displayed  
153 in Suppl. Fig. S1), consistent with the previous report by Marin et al. (2004). Only a few  
154 mRNAs were significantly changed at all sampling points, i.e. 31 showed elevated levels and  
155 19 were down-regulated.

156 To evaluate the microarray data set systematically, a cluster analysis was performed using  
157 *mfuzz* (Kumar and Futschik, 2007). Initially, 8538 transcript types were differentiated,  
158 including all mRNAs but also 5'UTRs, asRNAs, sRNAs and transcripts derived from start  
159 sites within genes; Suppl. Table S2). Two clusters (cluster 1 and 2) include transcripts that  
160 were induced and two other clusters (cluster 3 and 4) include transcripts that were repressed  
161 at specific time points after salt addition (Fig. 2A). Transcripts in cluster 1 and 3 peaked at  
162 0.5 h, while transcripts in cluster 2 and 4 peaked at the 2 h time point. The majority of genes  
163 in all clusters, most pronounced in case of cluster 3, showed a clear tendency to return to the  
164 initial values at the end of the time course indicating that the short-term acclimation was  
165 complete.

166 Specific transcript types showed an uneven distribution in the different clusters, i.e. clusters 1  
167 and 2 contain a significantly higher number of asRNAs and lower number of sRNAs while  
168 cluster 3 and 4 showed the opposite. Protein-coding transcripts are more present in the  
169 downregulated clusters (780 mRNAs) than in the upregulated clusters (690 mRNAs) (Fig.

170 2B). Functional enrichment analysis of the proteins encoded by mRNAs in each cluster was  
171 performed according to annotations from KEGG Orthology (KO) terms. On the one hand,  
172 mRNAs within the rapidly induced cluster 1 are enriched in proteins associated to replication  
173 and repair, cofactor biosynthesis, signaling, and transport, while the mRNAs of cluster 2 are  
174 enriched in protein families associated to transport, genetic information processing such as  
175 chaperones and folding catalysts, ribosome biogenesis, or transcription factors (Fig. 2C). On  
176 the other hand, transiently repressed mRNAs in the clusters 3 and 4 showed similar  
177 functionalities, and thus were analyzed jointly. The most pronounced functional enrichment  
178 could be seen for transcripts encoding proteins associated to energy and metabolism, such  
179 as oxidative phosphorylation, photosynthesis, nitrogen metabolism, or related metabolic  
180 functions, such as pathways of porphyrin and chlorophyll metabolism, lipid biosynthesis or  
181 pathways for carbon metabolism.

### 182 ***Salt-regulated asRNA:mRNA pairs***

183 Most of the salt-induced changes of asRNA levels were transient, consistent with the  
184 observations for mRNAs. Our analysis considered only asRNAs that overlap on the opposite  
185 strand with the respective mRNAs, which led to the identification of 79 inversely regulated  
186 and 82 co-regulated asRNA/mRNA pairs (Fig. 3) at a Pearson correlation coefficient  $\geq |0.65|$   
187 (details in Table S4). Previous work in *Synechocystis* 6803 showed that both modes of  
188 regulation can be functionally relevant (Dühring et al., 2006; Eisenhut et al., 2012; Sakurai et  
189 al., 2012).

190 Among the asRNA/mRNA pairs is *sll1862* (Fig. 3D) encoding one of the most abundant salt  
191 shock proteins (see below). The massive accumulation of stress protein Sll1862 is correlated  
192 by the inversely related levels of its mRNA versus asRNA. Another asRNA seems to be  
193 involved in controlling the salt-stimulated expression of *slr0082* (Fig. 3D), which encodes the  
194 ribosomal protein S12 methylthiotransferase RimO. This gene was early detected to be salt-  
195 induced by subtractive hybridization (Vinnemeier and Hagemann, 1999). It is transcribed in  
196 an operon together with the RNA helicase CrhR, which has been shown to be involved in  
197 multiple stress responses and is regulated by redox changes (Ritter et al., 2020). Moreover,  
198 the mRNA level of *sll0923* encoding the tyrosine kinase Wzc was less abundant after salt  
199 addition (Wzc protein level was lowered with a FC of 0.53), while the corresponding asRNA  
200 showed increased abundance (Fig. 3C). Wzc is involved in the synthesis of extracellular  
201 polysaccharides (EPS; Pereira et al., 2019), hence, the lowered expression of *sll0923* is  
202 consistent with observation of reduced EPS synthesis in salt-acclimated *Synechocystis* 6803  
203 cells (Kirsch et al., 2017). Among the 56 mRNA/asRNA pairs showing similar induction  
204 patterns, the gene *slr0953* encoding sucrose-phosphate phosphatase showed higher mRNA  
205 as well as asRNA levels (Fig. 3E). It could be assumed that in this case the asRNA supports

206 the stability of the *slr0953* mRNA contributing to the transiently elevated sucrose levels in  
207 salt-treated cells.

208 Moreover, we identified also not previously known salt-regulated transcripts, e.g. the *sll1470*  
209 asRNA (Fig. 3). Although this asRNA originates from a TSS downstream of *sll1470*, it  
210 overlaps the 3' end of the gene and a clear anti-correlation with the transcript accumulation  
211 of *sll1470* during salt shock was detected (Fig. 3C). Gene *sll1470* encodes the large subunit  
212 of 3-isopropylmalate dehydratase, an important enzyme connecting pyruvate metabolism  
213 with leucine/isoleucine/valine biosynthesis. Therefore, its lowered expression during early  
214 salt shock likely contributes to the metabolic reorganization towards synthesizing GG  
215 consistent with the lowered valine accumulation (see below).

### 216 ***Salt-regulated sRNAs***

217 The used microarray also permitted to search for salt-induced changes in the abundance of  
218 sRNAs, which are in contrast to asRNAs encoded in trans. Interestingly, according to the  
219 cluster analysis (Fig. 2), both ncRNAs types responded differently to the salinity increase:  
220 asRNAs were mainly upregulated (cluster 1 and 2) while sRNAs were mainly downregulated  
221 (cluster 3 and 4). The salt-induced sRNA patterns, were again highly dynamic and mainly  
222 transient. For example, the sRNA IsaR1 was found to be transiently up-regulated in response  
223 to salt but returned to control levels in long-term salt acclimated cells (Suppl. Table S1).  
224 IsaR1 is a key player in the acclimation of the photosynthetic apparatus to iron starvation by  
225 targeting several mRNAs encoding Fe<sup>2+</sup>-containing proteins and enzymes involved in  
226 pigment and FeS cluster biosynthesis (Georg et al., 2017). In addition to its role in iron  
227 acclimation, IsaR1 controls directly the synthesis of a key enzyme in GG synthesis, GgpS at  
228 the post-transcriptional level early during salt acclimation (Rübsam et al., 2018).

229 Altogether, eleven sRNA candidates were found to be differentially expressed at all-time  
230 points, three candidates were up- and 8 were down-regulated (Suppl. Table S5). Their  
231 potential roles in the salt acclimation process is an interesting topic for future research.

### 232 ***Global evaluation of the proteome in salt-acclimated cells***

233 Proteome analyses using data-independent acquisition mass spectrometry (HDMS<sup>E</sup>) were  
234 performed with extracts from cells cultivated at either 0% NaCl (control cultures) or 4% NaCl  
235 (7 days' salt-acclimated cultures, Fig. 1). To improve coverage and to obtain additional  
236 information on cellular localization, the proteome of different fractions was analyzed: 1. Total  
237 protein extracts obtained without any centrifugation; 2. The debris fraction obtained after low  
238 speed centrifugation (yellowish brown pellet); 3. The soluble fraction representing the blueish  
239 supernatant after high-speed centrifugation; and, 4. The membrane-enriched fraction  
240 representing the washed green pellets after high-speed centrifugation (further details are  
241 described in the supplementary material).

242 In total, 1816 proteins, approximately 52% of the entire proteome of *Synechocystis* 6803 in  
243 the UniProt database, were identified by at least two tryptic peptides per protein (Suppl.  
244 Table S6). In particular, 1253 proteins were found in the total extracts and 823 in the soluble  
245 fraction, while 1608 and 1421 proteins were identified in the membrane-enriched and debris  
246 fractions, respectively (Fig. 4). Similar to previous reports on the *Synechocystis* 6803  
247 proteome (Gao et al., 2015a), many proteins (79%) were found in both, the soluble as well as  
248 the membrane fractions, although the membrane pellet was washed with high salt and high  
249 pH buffers. The occurrence of proteins in different fractions clearly correlates with their  
250 numbers of transmembrane helices (Suppl. Fig. S2). In the present study, we also  
251 investigated the cell debris that is usually removed from proteome analyses if cellular  
252 fractionation is performed. The vast majority (96.3%) of proteins in this fraction was also  
253 identified in the membrane-enriched fraction. However, 29 proteins were exclusively found in  
254 the debris fraction, for example the large Slr1567 protein, a putative outer membrane protein  
255 (Suppl. Table S7). Many other proteins enriched in the debris fraction are annotated as  
256 components of the cell envelope or of the outer membrane-bound periplasmic space.

257 Salt-dependent changes in protein abundances were evaluated in total protein extracts as  
258 well as three subcellular fractions (Fig. 4). For the selection of differentially expressed  
259 proteins cut-off criteria were defined by a fold change of  $\geq |1.5|$  and a corresponding p-value  
260  $< 0.05$ . However, for a large number of proteins less pronounced fold change values were  
261 also statistically significant. The volcano plots indicate that the group of stably up-regulated  
262 proteins (Suppl. Fig. S3) displayed larger fold changes than down-regulated proteins,  
263 resembling the observations made with the transcriptomic data (Suppl. Fig. S1).

264 Next, we analyzed whether or not particular proteins showed consistent salt-related changes  
265 in the different proteome fractions. For most proteins, well-matching values were found in the  
266 different fractions and in the total extract. However, in some cases the relative abundances  
267 showed an inverse relation in membrane and soluble fractions. For example, many ribosomal  
268 proteins occurred in lower amounts in the soluble fraction but were elevated in the  
269 membrane and debris fractions of salt-acclimated cells compared to control cells (Suppl. Fig.  
270 S4). Similar patterns were found, among others, for the subunits of the ATP synthase, the  
271 phycobilisome linker polypeptides, and the RNA polymerase. These results indicate  
272 cultivation-dependent differences in the distribution of proteins to the different cellular  
273 fractions as reported in other studies (Gao et al., 2015b; Pattanayak et al., 2020). In our  
274 case, some protein complexes such as ribosomes might be more stable under high salt  
275 conditions, resulting in their enrichment in the membrane fraction and depletion in the soluble  
276 fraction. To deal with this situation, we calculated a weighted fold change from the  
277 subcellular fractions data of each protein and showed that it was highly concordant with the  
278 corresponding fold change from the total protein extract (Suppl. Fig. S5; more detailed



279 description is given in the supplementary material). Finally, the mean value of the weighted  
280 fold change from the subcellular fractions and the fold change from the total protein extract  
281 was used. If only one of these two values was available, it was used directly as final fold  
282 change. This led to a list of 1803 proteins, to which two membrane proteins were appended  
283 that are known (Slr0531) or suspected (Sll1037) to be important for salt acclimation, but were  
284 identified by individual peptides only. As a final result, 190 proteins were up-regulated and  
285 189 protein down-regulated 7 days after salt shock among the 1805 quantified proteins  
286 (Suppl. Table S6).

### 287 ***Correlation analysis of salt-stimulated transcriptome and proteome***

288 A correlation analysis was performed to analyze the overall relation between transcriptomic  
289 ( $\log_2$  fold changes of mRNA after 24 h) and proteomic changes ( $\log_2$  fold changes of protein  
290 abundances after 7 d). 1749 transcript/protein pairs could be matched (Fig. 5; Suppl. Table  
291 S8). The Pearson correlation coefficient for the proteomic and transcriptomic data sets was  $r$   
292 = 0.58 indicating a quite good relationship, especially taking into consideration that sampling  
293 was done in different laboratories and at different time points. To grade the correlation  
294 between the newly acquired transcriptomic and proteomic data sets, we also compared our  
295 proteome data to the previously published transcriptome data sets by Marin et al. (2004) and  
296 Billis et al. (2014). In both cases, lower correlation coefficients of  $r = 0.41$  and  $r = 0.42$ ,  
297 respectively, were obtained. Next, we calculated the correlation coefficients between our  
298 transcriptome data and the transcriptome data of Marin et al. (2004) and Billis et al. (2014)  
299 using the same subset of mRNAs as for the comparison with the proteome. Surprisingly, the  
300 obtained coefficients of  $r = 0.49$  and  $r = 0.50$  showed a slightly lower correlation between  
301 different transcriptomic data sets than correlation between the proteomic and the present  
302 transcriptomic data set (Fig. 5C). These findings indicate that culture conditions significantly  
303 influence the comparability of different data. Nevertheless, in all cases a close correlation  
304 was observed for the expression of genes that are of direct importance for salt acclimation,  
305 while the expression of other genes can vary depending on small differences between the  
306 culture conditions leading to relatively low Pearson correlation coefficients.

### 307 **Detailed examination of specific processes**

#### 308 ***Compatible solute metabolism and transport constitutes a salt-specific stimulon***

309 Central to salt acclimation of *Synechocystis* 6803 is the accumulation of the main compatible  
310 solute GG, because mutants affected in the genes *ggpS* and *ggpP* (*stpA*) encoding the GG  
311 synthesis enzymes showed the highest degree of salt sensitivity compared to wild type  
312 (Hagemann et al., 1997; Marin et al., 1998). As initially found by Reed and Stewart (1985),  
313 salt-acclimated cells accumulate high amounts of the compatible solute GG, which  
314 represents the by far largest pool of low molecular mass organic compounds. The amount of

315 GG is approximately 2000times higher in salt-grown cells compared to the trace amounts of  
316 GG in control cells (Fig. 6C). The second compatible solute sucrose is approximately 1000-  
317 fold less abundant ( $0.28 \text{ nmol OD}_{750}^{-1} \text{ ml}^{-1}$ ) than GG in salt-acclimated cells (Suppl. Table  
318 S10), because it mainly plays a role as transiently accumulated osmolyte after salt shocks in  
319 *Synechocystis* 6803 (Kirsch et al., 2019).

320 Corresponding to the high GG accumulation, the GgpS and GgpP proteins and mRNAs  
321 showed significantly elevated levels (Table 2), which is supported for GgpS by Northern- and  
322 Western-blotting (Fig. 6AB). The sucrose synthesis enzymes Sps and Spp also exceeded  
323 the threshold for significant protein changes (Table 2), whereas the *sps* mRNA was only  
324 transiently increased (Suppl. Table S1) consistent with the transient accumulation profile of  
325 sucrose (Kirsch et al., 2019). The *ggpS* downstream gene *glpD* encoding glycerol 3-  
326 phosphate dehydrogenase, which is involved in the synthesis of the GG precursor glycerol 3-  
327 phosphate (G3P) from dihydroxyacetone phosphate, is also salt-stimulated. Overlapping with  
328 the *ggpS* promoter region exist the small ORF *ssI3076* that encodes for the *ggpS* repressor  
329 GgpR (Klähn et al., 2010b), which could not be detected in the proteome. Upstream of *ggpS*  
330 on the opposite strand, the genes for the GG hydrolase (GghA) and glycerol kinase (GlpK),  
331 the latter is involved in synthesis of the GG precursor G3P from glycerol, are located. They  
332 show similar expression pattern as *ggpS*. In contrast to the salt induction of genes for G3P  
333 synthesis, the *glgC* gene encoding the enzyme for ADP-glucose synthesis, the second  
334 precursor for GG, is not salt-regulated on RNA or protein levels.

335 Immediately downstream of *ggpP*, the salt-induced GgtA protein is encoded that acts as the  
336 ATP-binding subunit of the GG transporter (Ggt). The genes for the other Ggt subunits,  
337 GgtB, C and D (two of them were identified among the salt-stimulated proteins) form a  
338 separate salt-induced operon. The co-regulation of genes and proteins for GG synthesis and  
339 the ABC-type osmolyte transporter Ggt, which all belong to the cluster 2 (Table 2), indicates  
340 their functional cooperation in salt-acclimated cells, in which the transporter is mainly  
341 responsible for the avoidance of GG (and sucrose) leakage from the cells (Mikkat and  
342 Hagemann, 2000). However, the GG hydrolase GghA (Slr1670), which degrades GG into  
343 glucose and glycerol after hypo-osmotic treatments (Kirsch et al., 2017), showed also  
344 enhanced expression on mRNA and protein level in salt-acclimated cells. It has been  
345 discussed that the GG synthesis and degradation are mainly regulated at enzyme activity  
346 level that are differentially affected by cellular ion contents; elevated internal ion content  
347 leads to biochemical activation of GG synthesis and inactivation of GG cleavage (Kirsch et  
348 al., 2019). Hence, the increased amounts of putatively biochemically inactive GghA protein  
349 likely prepares *Synechocystis* 6803 cells for sudden decreases in osmolarity. It should be  
350 noted that the GgpP and GlpD proteins involved in GG synthesis were not detected in the  
351 soluble but exclusively in the membrane-associated fraction. This localization could indicate

352 that these proteins might be involved in additional processes such as fatty acid (GlpD) or  
353 EPS (GgpP) biosyntheses (Kirsch et al., 2017).

354 Finally, the salt-induced proteins involved in GG metabolism and transport as well as in G3P  
355 synthesis are obviously part of a larger group of salt-induced genes/proteins in  
356 *Synechocystis* 6803, which presumably can form a salt-regulon. Using *ggpS* as search string  
357 in the CyanoExpress database, which compiles gene expression data sets from  
358 *Synechocystis* 6803 (Hernandez-Prieto and Futschik, 2012), revealed more than 30 genes  
359 showing similar expression pattern under different environmental stimuli (Suppl. Fig. S6).  
360 The occurrence of all genes related to GG biochemistry, which are proven to be involved in  
361 salt acclimation, make it very probable that several of the co-regulated genes encode  
362 proteins also specific for this stress acclimation. This assumption is supported by our finding  
363 that many of these proteins also accumulated to higher levels in salt-acclimated cells. In  
364 cases where the protein levels were not significantly elevated, the corresponding gene  
365 showed only transient stimulation at the earliest time points after salt addition (Suppl. Fig.  
366 S6).

#### 367 ***Transporters and channels belonging to the salt-specific stimulon***

368 Clustering and functional enrichment analyses clearly indicated that differential regulation of  
369 proteins related to membrane transport is generally an important mechanism for salt  
370 acclimation (Suppl. Table S9). Among them, the mechanosensitive channel protein of small  
371 conductance (MscS) Slr0639 accumulated to the highest level, fold change of 14.3 (RNA  
372 approximately 2-fold) (Suppl. Table S6; Fig. 7). Two other MscS proteins, Slr0765 and  
373 Sll1040 were identified at elevated protein and RNA levels as well. Msc proteins are  
374 important for proper acclimation to hypo-osmotic treatments to facilitate quick release of  
375 compatible solutes and to prevent burst of cells (Levina et al., 1999). Hence, similar to  
376 elevated GghA, the MscS accumulation likely prepares the cell for upcoming events of lower  
377 osmotic pressure as safety valves as has been also shown in many heterotrophic bacteria  
378 (Perozo et al., 2001; Stokes et al., 2003). In contrast, the abundance of MscL (Slr0875),  
379 which is involved in water movements after sudden osmotic shocks on *Synechocystis* 6803  
380 (Shapiguzew et al., 2005; Azad et al., 2011), did not change in long-term salt-acclimated  
381 cells.

382  $\text{Na}^+/\text{H}^+$  antiporters are considered as main exporters of excess  $\text{Na}^+$  and, therefore, play a  
383 crucial role for salt acclimation (Hagemann, 2011). The *Synechocystis* 6803 genome codes  
384 for six  $\text{Na}^+/\text{H}^+$  antiporters, five of them were identified in the proteome. Among them, the  
385 protein abundance of NhaS2 and NhaS5 was significantly enhanced in salt-acclimated cells  
386 (Fig. 7), whereas the amount of NhaS3, which is essential for cell viability and was discussed  
387 to be mainly responsible for  $\text{Na}^+$  export (Wang et al., 2002; Elanskaya et al., 2002), remained

388 unchanged (Suppl. Table S6). However, the fact that the abundance of a protein remains  
389 unchanged does not exclude an essential function of this protein for salt acclimation,  
390 because it could be regulated on biochemical level according to cellular demands. While  
391 crucial roles were assigned to NhaS2 under low Na<sup>+</sup>/K<sup>+</sup> ratios (Mikkat et al., 2000) or growth  
392 at different pH values (Wang et al., 2002), the *nhaS5* mutant did not show any changes  
393 compared to wild type (Wang et al., 2002; Elanskaya et al., 2002). Unfortunately, none of the  
394 previously discussed candidates for chloride exporters (SII1864, Slr0753, SII0855;  
395 Hagemann, 2011) could be identified in our proteome data set. Among them, only the gene  
396 *sII1864* was transiently stronger expressed on mRNA level in salt-shocked cells (Suppl.  
397 Table S1).

398 In addition, several other proteins potentially involved in ion transport were found in higher  
399 abundances in salt-acclimated cells (Fig. 7). For example, two of the 7 annotated cation-  
400 transporting ATPases (Wang et al., 2002) were elevated in the proteome (Slr1950 with FC  
401 1.8 and SII1614 with FC 1.68) and two hours after salt shock in the transcriptome as well.  
402 Furthermore, the amount of the protein Slr1257, which comprises a ligand-gated ion channel  
403 domain, increased 4-fold, whereas the corresponding mRNA was slightly below the threshold  
404 of 2-fold in salt-acclimated cells. Many other transport proteins such as Slr0798 (Zinc-  
405 transporting ATPase, FC 1.64), SII0615 (GDT1-like, possible Ca<sup>2+</sup>/H<sup>+</sup> antiporter, FC 1.59) or  
406 those involved in uptake of nutrients such as nitrate, phosphate, or magnesium were also  
407 present in higher amounts in salt-acclimated cells (Suppl. Tables S6, S9). Finally, several  
408 transporters involved in iron uptake are transiently up-regulated at mRNA level, which  
409 indicates that the transient influx of high NaCl amounts in the cells somehow interferes with  
410 the general ion homeostasis including iron availability. However, their expression returned to  
411 control mRNA as well as protein levels after long-term salt acclimation (Fig. 7).

#### 412 ***Many salt-induced proteins are involved in general stress response***

413 Two proteins of unknown function, SII1862 and sII1863 showed 9.9- and 13.3-fold,  
414 respectively, higher abundances in salt-acclimated cells (Table 3). Searches using  
415 CyanoExpress (Hernandez-Prieto and Futschik, 2012) revealed that these proteins are  
416 induced on mRNA level not only after salt stress but also in response to many other stress  
417 treatments, hence, they belong to the group of general stress proteins. The SII1863 protein  
418 was previously identified as the top salt-induced gene/protein (Fulda et al., 2006), while in  
419 the present study it shares the top four positions with two MscS proteins, which were not  
420 previously quantified. The induction of SII1862 and SII1863 also led to high total protein  
421 amounts in salt-acclimated cells, both of them belong to the 60 most abundant proteins.  
422 However, their inactivation by interposon mutagenesis did not result in a salt-sensitive  
423 phenotype (unpublished results of Hagemann group).

424 Several heat-shock proteins that are involved in protein folding and repair have been  
425 previously identified among the salt-induced, general stress proteins (Fulda et al., 2006). In  
426 the present study, only the 33 kDa chaperone (Sll1988) was more than 2-fold accumulated  
427 while its mRNA showed only a slight increase, whereas the amounts of DnaK, GroEL, or  
428 DnaJ proteins were not significantly changed. Moreover, the small, 16.6 kDa heat shock  
429 protein (Sll1514) was decreased despite its RNA accumulated after the salt addition (Table  
430 3), whereas it was found before in significant enhanced amounts in salt-acclimated cells  
431 (Fulda et al., 2006). These differences most probably result from different cultivation  
432 conditions and sampling times in the different studies. Many other salt-stimulated proteins  
433 have no functional annotations, however, the proteins Slr0967, Slr2019, Sll0528, and Sll0947  
434 were all also implicated in multiple stress responses of *Synechocystis* 6803 (Uchiyama et al.,  
435 2014; Matsushashi et al., 2015; Lei et al., 2014; Galmozzi et al., 2016).

436 Moreover, an overlap between salt stress and iron-starvation response has been often  
437 observed, because in previous studies many genes/proteins serving as markers for iron-  
438 starvation have been observed in elevated amounts in salt-stressed cells as well (Marin et  
439 al., 2004; Fulda et al., 2006). In the present study, many proteins related to iron transport are  
440 found at higher mRNA levels in the early time points (Fig. 7, Suppl. Table S1). However, in  
441 long-term acclimated cells only two iron-regulated proteins are significantly elevated (Table  
442 3). The general stress protein Slr1894, which is annotated as MrgA or Dps like protein, was  
443 found in higher abundances in salt-acclimated cells. It has been shown to be involved in  
444 oxidative stress response (Li et al., 2004) or in the mobilization of iron-storage after transfer  
445 from iron-replete into iron-deplete conditions (Shcolnick et al., 2007). Furthermore, flavodoxin  
446 (*isiB*) is clearly accumulated, which plays an important role in the salt-stimulated  
447 photosynthetic cyclic electron transport (Hagemann et al., 1999).

#### 448 ***Salt effects on proteins involved in the basic cell physiology***

449 Previous transcriptome analysis revealed that genes encoding subunits of protein complexes  
450 are co-regulated in salt-stressed cells (Marin et al., 2004). The evaluation of the proteome  
451 data showed that the abundances of most proteins belonging to the photosystem (PS) I and  
452 II, phycobilisomes, ribosomes, or enzymes of the tricarboxylic acid (TCA) cycle were slightly  
453 lower after long-term salt acclimation (Fig. 8). Only a few exceptions were found. The Psb28  
454 protein of PSII was elevated (FC 1.8). This subunit is involved in PSII assembly and repair  
455 (Nowaczyk et al., 2012), thus its higher amount could indicate that the PSII is less stable in  
456 salt-acclimated cells. As another example, the transcript levels of *sll1471* encoding the  
457 CpcG2 phycobilisome rod-core linker polypeptide was strongly reduced in the microarray  
458 dataset upon short term salt stress and exhibited a lowered protein level ( $\log_2$  FC of -0.42) as  
459 well. CpcG2 is the rod core linker of the smaller CpcL-phycobilisome type (Kondo et al.,

460 2005; Liu et al., 2019b), which has been implicated in the formation of a PSI/NDH  
461 supercomplex in *Synechocystis* 6803 (Gao et al., 2016). Furthermore, alpha phycocyanobilin  
462 lyase (CpcF, *sll1051*), a protein involved in phycobiliprotein assembly into phycobilisomes,  
463 increased 1.7-fold. Another phycocyanobilin lyase (CpcE, *slr1878*) was also increased.  
464 Finally, many ribosomal proteins showed a tendency to slightly lowered amounts (Fig. 8),  
465 which correlates with the slower growth of salt-acclimated cells (Hagemann et al., 1994). The  
466 results show that cells acclimated to 684 mM NaCl for 7 days have reached a new steady  
467 state, in which many basic physiological processes differ from the control cultures. Regarding  
468 basic cellular processes our current transcriptome data of salt-shocked cells after 24 h  
469 showed a high agreement with the proteome data.

470 The potential impact of high salinity on the cell surface of *Synechocystis* 6803 cells is  
471 indicated by the observation that 8 salt-induced proteins were found among the 19 identified  
472 proteins of the functional category „Murein sacculus and peptidoglycan“. These proteins  
473 include MurF (Slr1351), DacB (Slr0804), MurA (Slr0017), MurG (slr1656) and MltA (Sll0016),  
474 which all are enzymes probably involved in cell wall or cell envelope biogenesis (Suppl.  
475 Table S6). Their coordinated up-regulation indicates that salt stress induces a reorganization  
476 of cell wall structures, which possibly decrease its permeability for inorganic ions. Changed  
477 abundances of several further proteins involved in the reorganization of the cell surface  
478 support this assumption. The lowered abundance of Wzc (Sll0923) is consistent with the  
479 lowered amount of EPS of salt-acclimated cells (Kirsch et al., 2017). Some of the most giant  
480 proteins encoded in the *Synechocystis* 6803 genome that are believed to have functions in  
481 the cell envelope, such as the 192 kDa protein Sll0723 (FC 3.9) and the 214 kDa protein  
482 Sll1265 (FC 1.6) accumulated in salt-acclimated cells. However, in contrast to the proteins  
483 participating in salt-regulated compatible solute synthesis or ion transport, a lower correlation  
484 between mRNA and protein abundances was found for the proteins involved cell envelope  
485 related processes.

#### 486 ***Differential expression of regulator proteins***

487 Regulatory proteins are highly important for stress acclimation, but were underrepresented in  
488 the proteome data. Only three out of 86 identified regulatory proteins showed significantly  
489 elevated protein but not increased mRNA levels in our study. All three represent different  
490 members of two-component regulatory systems (Sll1624 – Rre18, Slr1324 – Hik 23, Slr6110  
491 - Rre on plasmid pSYSX). However, none of them is functionally characterized and none of  
492 the previously identified salt-stress-associated two-component regulators (Marin et al., 2003;  
493 Shoumskaya et al., 2005) showed higher protein amounts here. Further 15 proteins among  
494 the 86 identified regulatory proteins were found with lower abundances in salt-acclimated  
495 cells, mostly in concordance to their mRNAs.

496 The list of genes co-regulated with *ggpS* and other genes/proteins for the GG biochemistry  
497 included one transcription factor, PrqR (Slr0895; Suppl. Fig. S6). Hence, it is tempting to  
498 speculate that PrqR might be involved in the salt-stimulated expression of *ggpS* and other  
499 genes in this putative regulon. PrqR was reported as repressor for genes involved in glucose  
500 metabolism and oxidative stress acclimation (Khan et al., 2016). The LexA protein, which is  
501 not changed on protein level but became significantly decreased on RNA level (Suppl. Fig.  
502 S7), has been shown to act as negative regulator of GgpS and GgpP expression (Takashima  
503 et al., 2020). However, the fact that the abundance of a protein remains unchanged does not  
504 exclude an important function of this protein for salt acclimation, because especially  
505 regulatory proteins are often activated/inactivated upon association with other proteins or  
506 metabolic signals. Moreover, the expression of genes for other annotated transcription factor  
507 changed. For example, the gene *sll0998* encoding the transcription factor RbcR, which  
508 regulates the expression of the key CO<sub>2</sub>-fixing enzyme ribulose 1,5 bisphosphate  
509 carboxylase/oxygenase (RubisCO), showed lower abundances on protein and RNA levels in  
510 salt-acclimated cells. Albeit not passing our significance criteria, both the large and small  
511 subunit of RubisCO were reduced by 20-30% that could indeed result in lower CO<sub>2</sub>-fixing  
512 activity given the high amount of RubisCO protein per cell.

513 Finally, sigma factor cascades have been implicated in the stress acclimation of bacteria.  
514 Among the down-regulated genes as well as proteins is the anti-sigma F factor antagonist  
515 Slr1859 (Suppl. Fig. S7), whose homolog in *Bacillus subtilis* is involved in posttranslational  
516 regulation of Sigma factor F (Clarkson et al., 2004). Interestingly, the Sigma F (Slr1564),  
517 which itself showed an unchanged protein abundance, is one of the candidate factors  
518 involved in mediating the salt-dependent expression of *ggpS* (Marin et al., 2002). Other  
519 sigma factors, particularly the genes encoding SigB and SigC were transiently induced after  
520 salt addition, while the amount of SigC slightly decreased in the proteome (SigB not  
521 identified) (Suppl. Fig. S7). Mutations of these group 2 sigma factors have been shown to  
522 reduce the stress tolerance including salt resistance of *Synechocystis* 6803 (Tyystjärvi et al.,  
523 2013). Hence, the salt-dependent activity of different sigma factors might significantly  
524 contribute to the observed salt-induced expression changes on transcript and protein levels.

### 525 ***Salt stress differentially affects chromosome regions***

526 Most salt-regulated proteins are encoded by single genes or in small operons that are spread  
527 on the *Synechocystis* 6803 chromosome. However, some salt-regulated genes are clustered  
528 on specific chromosomal regions. The most remarkable examples are clusters including the  
529 genes *ggpS* and *ggpP*, which were found in regions on the chromosome comprising several  
530 genes/proteins with salt-stimulated expression. The *ggpS* cluster comprises 9 salt-regulated  
531 genes, which are at least transiently stronger expressed in salt-grown cells than in control

532 cells (Suppl. Fig. S8). Upstream of the *ggs/glpD* operon, on the opposite strand, a salt-  
533 regulated gene cluster of at least 7 genes (*slr1670-1677*) is found. This gene organization is  
534 widely conserved in the genomes of many GG-accumulating cyanobacteria (Kirsch et al.,  
535 2017). A second salt-stimulated gene cluster can be found downstream of *ggsP* and *ggsA*,  
536 which comprises 5 different genes (Suppl. Fig. S9). In addition to *glpK* four other genes  
537 (three encode subunits of protochlorophyllide synthase, e.g. ChlN, *slr0750*; see Table 3) are  
538 at least transiently salt-regulated but have not yet shown to code for proteins directly involved  
539 in salt acclimation.

540 Another salt-stimulated gene cluster was found on the plasmid pSYSA. The genes *sll7063-*  
541 *sll7067* (for one example see Table 3) are *cas* genes that encode structural proteins of one  
542 of the three CRISPR-Cas systems in *Synechocystis* 6803, called CRISPR2 (Scholz et al.,  
543 2013). The five proteins were significantly up-regulated whereas the transcripts were  
544 transiently down-regulated and then slightly up-regulated after 24 h of salt acclimation. In  
545 contrast, the CRISPR3 system (*sll7085-sll7090*) on the same plasmid was consistently  
546 down-regulated at RNA and protein level. Recently, it has been shown that these proteins  
547 form a stable protein complex together with their cognate crRNAs (Riediger et al., 2021).

548 There are also some examples of coordinately down-regulated genes/proteins in salt-  
549 acclimated cells. One example is the large region (chromosome positions 1181250 –  
550 1200000) comprising 22 genes, which are forming three operons (Suppl. Fig. S10). The first  
551 operon *slr1406-1410* encodes proteins of unknown function. The second salt-repressed  
552 operon is situated on the opposite strand (*sll1307-1304* and *sll1784-1785*) and also mostly  
553 encodes not functionally annotated proteins; however, the protein Sll1305 resembles ketose  
554 3-epimerases while Sll1307 and Sll1784 are predicted outer membrane-bound periplasmic  
555 proteins. Hence it can be speculated that these proteins are somehow involved in cell wall  
556 synthesis/reorganization. The third salt-repressed operon in this region comprises the genes  
557 *slr1852-1862*. This cluster contains several annotated genes (Slr1855 N-acetylglucosamine  
558 2-epimerase, Slr1856 – anti-sigma factor antagonist, GlgX1 – glycogen branching enzyme 1,  
559 IcfG – carbon metabolism regulator), which play important roles in the primary carbon  
560 metabolism and, particularly, its regulation (Beuf et al., 1994; Shi et al., 1999). Another  
561 example of coordinated down-regulated genes/proteins represents the large operon *slr0144-*  
562 *0152*, which has been noted before as one of the highly coordinated expressed regions on  
563 the chromosome of *Synechocystis* 6803 (e.g., Summerfield and Sherman, 2008) that is  
564 controlled by the redox-responsive transcription factor RpaB (Riediger et al., 2019).

## 565 **Metabolome analysis of salt-acclimated cells**

566 The presence of high NaCl amounts in the medium induces a massive GG accumulation  
567 (Fig. 6C), which likely triggers a strong redistribution of organic carbon in *Synechocystis*



568 6803. The large impact of GG synthesis on overall carbon metabolism is also consistent with  
569 the observation that many proteins (and their genes) involved in glycogen metabolism as well  
570 as glycolysis showed significant changes in their abundances (Table 4). For example, the  
571 neopullulanase, glycogen phosphorylase GlgP2 (Slr1367) and one debranching enzyme  
572 GlgX1 (Slr0237, the other one Sll1857 is decreased) showed higher abundances on protein  
573 as well as RNA levels in salt-acclimated cells. The different response of the two GlgX  
574 proteins towards salt stress has been previously shown with Western-blotting (Iijima et al.,  
575 2015). Hence, the demand of organic carbon for the synthesis of GG precursors is at least  
576 partly supported by an enhanced glycogen breakdown and reduced glycogen build up,  
577 because glycogen and GG synthesis are competing for the same precursor, ADP glucose.  
578 The relatively low carbon/nitrogen state in salt-acclimated cells is also reflected by the  
579 lowered amount of 2-oxoglutarate (2OG, Fig. 9), which is the key metabolic signal reporting  
580 changes of the cellular carbon/nitrogen ratio in cyanobacteria (Hagemann et al., 2021).

581 To obtain a snapshot on metabolites of the central carbon and nitrogen metabolism, LC-  
582 MS/MS was used (Suppl. Table S10). The relative levels of the RubisCO carboxylation and  
583 oxygenation products 3PGA and 2PG, respectively, showed opposite behavior (Fig. 9).  
584 3PGA accumulated approximately 3-fold less in salt-acclimated cells, while 2PG was clearly  
585 enhanced. This could indicate a decreased  $\text{CO}_2/\text{O}_2$  ratio at the active site of Rubisco, since  
586 the amounts of these gasses mainly regulate its relative carboxylation/oxygenation activity.  
587 For example, it might be possible that due to the higher content of inorganic ions inside the  
588 salt-exposed cells carboxysomes are less gas tight in high salt-grown cells, thereby  
589 promoting a better diffusion of oxygen into carboxysomes reducing the  $\text{CO}_2/\text{O}_2$  ratio. The  
590 observed changes in the 3PGA and 2PG levels are consistent with the reported lower  
591 photosynthetic activity and growth rate in salt-acclimated cells of *Synechocystis* 6803 (e.g.,  
592 Hagemann et al., 1994), which certainly also reduce Calvin-Benson-cycle activity.  
593 Consistently, the protein abundances of photosynthetic complexes, Calvin-Benson-cycle  
594 enzymes including RubisCO and components of the cyanobacterial inorganic carbon-  
595 concentrating mechanism were found at 10-40% lower levels, which is below our significance  
596 threshold but might contribute to lower photosynthetic activity in salt-acclimated cells.  
597 Furthermore, more organic carbon could be taken out from the Calvin-Benson-cycle, which is  
598 for example seen in the increased amount of pyruvate and organic acids in the reductive  
599 branch of the TCA cycle, such as malate and fumarate. This interpretation is also supported  
600 by the finding that Gap1, the glyceraldehyde dehydrogenase 1 (Slr0884) involved in sugar  
601 catabolism (Koksharova et al., 1998) is also up-regulated (Table 4), while Gap2 involved in  
602 photosynthetic carbon assimilation did not change (Suppl. Table S1).

603 In addition to the carbon fixation and allocation, nitrogen assimilation is altered in salt-  
604 acclimated cells, which is reflected by enhanced glutamine and glutamate levels while 2OG,

605 the carbon skeleton used for ammonia assimilation decreased (Fig. 9). Increased glutamate  
606 levels have been often reported in salt-exposed bacteria (Hagemann, 2011), because this  
607 negatively charged amino acid is compensating the positive charge of cations, especially  $K^+$ .  
608 The enzymes involved in the GS/GOGAT cycle for assimilation of  $NH_4^+$  into 2OG did not  
609 significantly change their expression in long-term salt acclimated cells, but were significantly  
610 lowered immediately after salt addition. However, the glutamate decarboxylase Gad  
611 (Sll1641) showed increased expression in salt-grown cells. Proline, which is often used in  
612 heterotrophic bacteria as compatible solute and can be synthesized from glutamate, is not  
613 changed during salt acclimation of *Synechocystis* 6803 (Fig. 9). Moreover, aspartate and  
614 arginine levels decreased. These amino acids serve as precursors for cyanophycin, the  
615 nitrogen storage compound of *Synechocystis* 6803. In this regard it is interesting to note that  
616 cyanophycin synthetase (Slr2002, FC 0.64) was decreased on protein level while the mRNA  
617 did not change. Furthermore, the mutation of a gene presumably involved in cyanophycin  
618 turnover resulted in a salt-sensitive phenotype of *Synechocystis* 6803 (Zuther et al., 1998).  
619 These observations also add to the assumption of altered nitrogen assimilation in salt-loaded  
620 cells. Marked changes in the amino acid composition had been also reported for  
621 *Synechocystis* 6803 cells when grown in artificial seawater medium compared to BG11  
622 (Iijima et al., 2015). Similarly, global changes in the carbon- and nitrogen metabolism have  
623 been noticed in *Synechococcus* sp. PCC 7002 (Aikawa et al., 2019).

## 624 **Discussion**

### 625 ***Overall correlation of omics data***

626 Our proteomic and transcriptomic data showed a good relationship (Pearson correlation  
627 coefficient, 0.58) especially taking into consideration that sampling was done in different  
628 laboratories and at different time periods after salt treatment. This finding indicates that in  
629 most cases transcriptional activation/repression leads to enhanced/diminished protein  
630 amounts, whereas the differential regulated ncRNAs rather regulate single genes/proteins.  
631 Generally, relationships between the transcript and corresponding protein amounts are  
632 influenced by several processes, such as (1) impact of mRNA processing or ncRNAs on  
633 translation rates, (2) protein's half-life, and (3) protein synthesis delay (Liu et al., 2016).  
634 Other studies found widely differing correlation coefficients between cyanobacterial  
635 transcriptomes and proteomes depending on the conditions examined. For example,  
636 experiments with *Synechocystis* 6803 cells shifted from high to low  $CO_2$  conditions showed  
637 also a good correspondence between transcriptomics and proteomics (Spät et al., 2021),  
638 whereas Toyoshima et al. (2020) reported a rather low correlation between transcriptomics  
639 and proteomics in *Synechocystis* 6803 cells grown under phototrophic, mixotrophic or

640 heterotrophic conditions. Similarly, a very low correlation was reported from an integrated  
641 proteomic and transcriptomic analysis of salt stress responses in *Synechocystis* 6803 (Qiao  
642 et al., 2013).

643 Moreover, the comparison of proteome and transcriptome data from different studies, despite  
644 the varying degree of correspondence, offers the possibility to filter out regularly, truly salt-  
645 regulated proteins. To this end, we compared three transcriptomic with our proteomic data  
646 sets to identify further proteins potentially involved with unknown function in salt acclimation.  
647 Filtering the four datasets for features that were at least 1.5-fold increased ( $\log_2 > 0.58$ ) in  
648 the three transcriptome data sets and at least 1.3-fold increased ( $\log_2 > 0.38$ ) in the  
649 proteome data set produced a list of 44 genes, for which in 25 cases the corresponding  
650 proteins were identified (Suppl. Table S11). This group of genes/proteins includes 11 that are  
651 involved in GG metabolism and ion transport. Among the rather general stress proteins with  
652 unknown function are the Sll1862 and Sll1863 proteins as well as the putative zinc  
653 metalloprotease Sll0528 and the Slr1894 protein, which all have been discussed before.  
654 Other proteins with unknown function in salt acclimation such as the methionine  
655 aminopeptidase B (MAP B, Slr0786; co-expressed with *ggpS*, Suppl. Fig. S6), Sll0723 and  
656 Slr0001 are candidate proteins for further studies. Among the 19 salt-induced genes, whose  
657 proteins were not identified in our study, only the *slr0530* gene product as component of the  
658 GG transporter is functionally related to known processes in salt acclimation.

659 The good correlation of transcriptomic and proteomic changes extends to the alterations on  
660 the metabolome level. Basic alterations in the central carbon and nitrogen metabolism are  
661 also supported by expression changes. However, biochemical alteration due to changed  
662 metabolite and ion levels on key enzyme activities certainly contribute to the novel metabolic  
663 homeostasis in salt-acclimated cells as has been recently discussed for the metabolic  
664 acclimation of *Synechocystis* 6803 towards different CO<sub>2</sub> availability (Jablonsky et al., 2016).

### 665 ***Salt shock leads to a temporally staggered reshaping of the transcriptome*** 666 ***composition***

667 The salt acclimation response goes way beyond the induction of gene expression required  
668 for the compatible solute machinery, it has clearly a great impact on general metabolism.  
669 Along the temporal axis, the reprogramming of gene expression can be differentiated  
670 between an early response with the respective minima and maxima leading to the four  
671 different clusters (Fig. 2). The metabolic response included the rapid repression of the  
672 ammonia assimilation system, detected by decreased transcript abundances for *amt1* and  
673 *glnA* encoding the ammonium transporter and the primary enzyme for ammonium  
674 incorporation, glutamine synthetase (GS). Consistently, increased transcript levels were  
675 found for genes *gifA* and *gifB*, which encode inhibitory proteins for GS, thereby blocking

676 ammonium assimilation (for an overview see Bolay et al., 2018). After 24 h the transcript  
677 levels of these genes were at the initial levels.

678 The question arises, which processes are responsible for the staggered reshaping of the  
679 transcriptome. It has been shown that shortly after salt addition the cytoplasmic composition  
680 underwent rapid changes due to ion and water movements, whereby the early high internal  
681 ion contents, especially of Na<sup>+</sup> are discussed to inhibit metabolic activities but also to trigger  
682 acclimation responses such as GG synthesis activation (reviewed in Hagemann, 2011). The  
683 transporters responsible for the rapid ion movements are largely unknown, especially verified  
684 candidates for Cl<sup>-</sup> export are still missing. In the present study we did not find marked  
685 expression changes for genes encoding potential anion exporters. It can be assumed that  
686 these transporters are mainly regulated on their activity levels to manage the ion regulation  
687 within the first minutes to hours after salt shock, because *de novo* protein synthesis is one  
688 process clearly down-regulated after salt shock (Hagemann et al., 1994). However, we found  
689 that especially in the early time points after salt shock multiple ncRNAs become up- or down-  
690 regulated, which were not covered in the previous transcriptomic datasets. These small  
691 RNAs likely reshape mainly the translational efficiency of specific target mRNAs. Hence, it is  
692 well possible that many of the identified asRNAs and sRNAs are important to fine tune the  
693 translational response in the acute stress situation. Further work is necessary to identify the  
694 specific targets of the sRNAs and to verify the action of the ncRNAs during salt acclimation in  
695 cyanobacteria.

### 696 ***Impact of salt on DNA structure***

697 The identification of chromosomal regions in the *Synechocystis* 6803 genome with  
698 coordinately up- or down-regulated genes under high salt conditions indicates that the DNA  
699 structure likely differs between distinct chromosomal regions (Suppl. Figs. S8-10). Similar  
700 observations were made when the impact of antibiotics that affect DNA supercoiling was  
701 analyzed on global gene expression patterns in *E. coli* and *Synechocystis* 6803.  
702 Interestingly, a large overlap has been observed between the antibiotic-induced gene  
703 expression changes and the salt and osmopressure responses (Cheung et al., 2003; Prakash  
704 et al., 2009). Hence, the salt-stimulated expression of genes in some chromosomal regions  
705 could be related to a relaxed DNA topology permitting easier access of the transcription  
706 machinery and *vice versa*. In this regard it is interesting to note that the gene *slr2058*  
707 encoding the DNA topoisomerase I is higher transcribed in the first hours after salt shock  
708 (Suppl. Tables S1 and S2). The ATP-dependent DNA topoisomerases relax negative  
709 supercoils and are specifically involved in chromosome partitioning, which has been shown  
710 to be of fundamental importance for bacterial gene expression (Dorman and Dorman, 2016).  
711 Recently, another subunit of DNA topoisomerase has been suggested to be involved in the

712 regulation of DNA replication in a mutant defective in one of the dominating DNA methylation  
713 activities in *Synechocystis* 6803 (Gärtner et al., 2019). It might be possible that differences in  
714 DNA methylation and thereby induced changes in the DNA/protein association are at least  
715 partly responsible for the different accessibility of specific chromosomal regions under  
716 different salt conditions. Finally, the interaction of chromosomal DNA with the GG  
717 synthesizing enzyme GgpS has been shown to be central for the ion-mediated  
718 activation/inactivation of its biochemical activity (Novak et al., 2011). Collectively, our data  
719 support the notion that changes in DNA structure and DNA/protein interactions due to altered  
720 ionic and electrostatic relations play an important role in microbial salt acclimation.

### 721 ***Future developments – regulation and application***

722 One still open question is how salt stress is sensed and transduced to the cellular gene  
723 expression machinery. Despite several efforts, specific salt-sensing proteins have not been  
724 identified in cyanobacteria. The screening of mutant collections defective in histidine kinases  
725 and cooperating response regulators identified some two-component systems that are  
726 involved in the salt-induced regulation of different general stress proteins, however, the  
727 induction of salt-specific proteins including *ggpS* remained unchanged (Marin et al., 2003;  
728 Shoumskaya et al., 2005). Two proteins were identified as repressors for *ggpS*, the small  
729 GgpR protein (Klähn et al., 2010b) and the transcriptional factor LexA have been shown to  
730 bind specifically the *ggpS* promoter (Takashima et al., 2020). However, the role of LexA as  
731 specific salt-sensing transcription factor is unlikely, because it is also involved in the  
732 regulation of many other processes in *Synechocystis* 6803, for example a verified role in fatty  
733 acid accumulation (Kizawa et al., 2017), and the *lexA* mutant has no reported salt-sensitive  
734 phenotype or changed GG accumulation. The present study identified two other likely  
735 candidates for a salt-stress specific gene regulation. First, the transcription factor PrqR  
736 (Slr0895) represents an interesting candidate, because the gene *slr0895* is clearly co-  
737 regulated with many genes coding proteins involved on GG metabolism (Suppl. Fig. S6). It  
738 has been recently shown that PrqR is involved in the acclimation to oxidative stress in  
739 *Synechocystis* 6803 (Khan et al., 2016). Salt stress is also inducing oxidative stress in  
740 cyanobacterial cells, hence, the finding of the role of PrqR in this stress acclimation process  
741 might of secondary importance. Second, the gene *ssl1326* that possibly encodes a CopG  
742 family transcription factor has been found strongly induced after salt shock in the DNA  
743 microarray data set (Suppl. Table S1). Further work is necessary to validate whether PrqR or  
744 CopG are somehow acting as salt-specific gene expression regulators. In the moment, it  
745 might well be possible that ion-mediated changes in the DNA structure, RNA-polymerase  
746 affinity, and enzyme activities might be the main and sufficient mechanism to acclimate  
747 towards different salt conditions in euryhaline bacteria such as *Synechocystis* 6803.

748 Furthermore, salt acclimation is becoming more important for applied research with  
749 cyanobacteria regarding the direct use of compatible solutes as well as mass cultivation in  
750 sea water to make the process more sustainable (Pade and Hagemann, 2014; Cui et al.,  
751 2020). For example, the cyanobacterial production of mannitol (Wu et al., 2020) and  
752 trehalose (Qiao et al., 2020) has been promoted by cultivation at enhanced salinities.  
753 Moreover, a more salt-tolerant version of the fast-growing *Synechococcus elongatus* strain  
754 UTEX2973 has been engineered by the expression of GG synthesis genes, which can be  
755 used for biotechnological purposes in full marine waters (Cui et al., 2021) However, saline  
756 conditions might also negatively affect the production titer. The large impact of GG  
757 accumulation on the overall carbon metabolism also negatively influenced the ethanol  
758 production with *Synechocystis* 6803 at 4% NaCl while 2% NaCl were slightly stimulatory  
759 (Pade et al., 2017). Salt-regulated, strong promoters might be an option to improve  
760 transgene expression in salt-grown cyanobacteria. Hence, a deeper knowledge on salt  
761 acclimation will promote future biotechnological applications with cyanobacteria.

## 762 **Material and Methods**

### 763 **Cultivation and sampling**

764 *Synechocystis* sp. 6803 substrain PCC-M was used in all experiments. Axenic cells were  
765 maintained on agar plates with BG11 mineral medium at 30°C under constant illumination.  
766 For salt stress experiments, axenic cells were grown photoautotrophically in glass tubes  
767 containing liquid BG11 medium (TES-buffered at pH 8) at 29°C in the cooperating  
768 laboratories. If not stated differently, cultures were aerated with CO<sub>2</sub>-enriched air (5% CO<sub>2</sub>  
769 [v/v]) and kept under continuous illumination of 150 μmol photons m<sup>-2</sup> s<sup>-1</sup> (warm light, Osram  
770 L58 W32/3). Control cells were cultured in NaCl-free BG11 medium, whereas salt-acclimated  
771 cultures were obtained after long-term growth (up to one week) in BG11 medium  
772 supplemented with 684 mM NaCl (4% NaCl [w/v]). For this, cells were transferred daily to  
773 fresh media with 4% NaCl. Short-term salt shock experiments were performed by adding  
774 crystalline NaCl to a final amount of 4% into control cultures at time point zero.  
775 Subsequently, cells were harvested at defined time points.

776 For proteomics, cells were harvested by centrifugation at 14,000 g and 4°C for 5 min. The  
777 cell pellets were frozen in liquid nitrogen and stored at -80°C. For metabolomics, cells were  
778 harvested by quick filtration on nitrocellulose filters (0,45 μm pore size) in growth light within  
779 30 s. Cells on filters were then frozen in liquid nitrogen and stored at -80°C. For  
780 transcriptomics, cells from 40 ml culture were harvested by quick filtration on hydrophilic  
781 polyethersulfone filters (Pall Supor-800, 0.8 μm), immediately immersed in 1 ml of cold PGTX  
782 solution (Pinto et al., 2009) and frozen in liquid nitrogen.

## 783 **Transcriptomic methods**

### 784 ***RNA extraction***

785 Total RNA was extracted as described previously (Hein et al., 2013). Prior to the microarray  
786 analysis, 10 µg of total RNA were treated with Turbo DNase (Invitrogen) according to the  
787 manufacturer's protocol and precipitated with ethanol/sodium acetate. RNA quality was  
788 verified by electrophoresis on MEN-buffered 1.5% agarose gels supplemented with 6%  
789 formaldehyde.

### 790 ***Microarray analysis***

791 To enable the comparison with a previous microarray analysis (Marin et al., 2004), we  
792 analyzed similar time points after salt shock: 0, 0.5, 2 and 24 h. Labeling and hybridization  
793 were performed as described (Klähn et al., 2015). Three µg of RNA were used for the  
794 labeling reaction and 1.65 µg of labeled RNA for the hybridization. The microarray  
795 hybridization was performed in duplicates for each sampling point. Almost all features on the  
796 microarray chip were covered by several independent probes. In addition, it contained  
797 technical replicates for each single probe. Hence, mean values for all probes of a given  
798 feature were used for the final calculation of fold changes. Data processing and statistical  
799 evaluation was performed using the R software as described (Klähn et al., 2015). The full  
800 dataset is accessible from the GEO database with the accession number GSE174316  
801 (accession for Reviewers via: izupwswenzelfkv).

802 In Suppl. Table S1 transcripts are separated into mRNAs, asRNAs, other ncRNAs, 5'UTRs  
803 and transcripts derived from internal TSSs, i.e. within CDS (int). However, it should be noted  
804 that for every category overlaps are possible, i.e. the annotation as well as microarray  
805 detection of ncRNAs is often ambiguous since they can overlap with UTRs. Thus, all features  
806 labeled with the systematic term "NC-#" are referred as "potentially" trans-acting ncRNAs.  
807 For the evaluation presented in the text only ncRNAs with an annotation based on Mitschke  
808 et al. (2011) were considered.

### 809 ***Cluster analysis***

810 Clustering analysis for the microarray time series was performed using the *mfuzz* R package  
811 (Kumar and Futschik, 2007). To reduce noise and false positives, only 3831 transcripts  
812 entered the clustering analysis that had a difference in their absolute expression values  
813 higher than  $\log_2 \geq |1|$  in at least one of these comparisons. The optimal cluster number was  
814 determined with the Elbow method using the minimum centroid distance and an estimated  
815 "fuzzifier" parameter of  $m = 2.53$ , yielding four clusters. Transcripts with low membership  
816 values  $< 0.5$  were removed. However, those transcripts were still included if the combined  
817 membership values for two similar clusters (e.g. cluster 1 + 2 and 3 + 4) exceeded  $> 0.6$ .

818 **Proteomic methods**

819 Cells from four biological replicates of salt-acclimated and control cultures, respectively, were  
820 broken with glass beads using Precellys 24 homogenizer (peqLab Biotechnologie GmbH,  
821 Erlangen, Germany) in non-denaturing buffer containing 10 mM Tris/HCl, pH 7.4, 138 mM  
822 NaCl, 2.7 mM KCl, 1 mM MgCl<sub>2</sub>. After withdrawing an aliquot of each cell extract as total  
823 protein the remaining cell extracts were fractionated into debris, soluble, and membrane-  
824 enriched fractions. Protein samples were reduced with dithiothreitol, alkylated with  
825 iodoacetamide and digested with trypsin in sodium deoxycholate-containing buffer solution  
826 (Pappesch et al. 2017).

827 LC-HDMS<sup>E</sup> analyses of desalted peptide samples supplemented with 40 fmol of Hi3 Phos B  
828 standard for protein absolute quantification (Waters) were carried out using a nanoAcquity  
829 UPLC system (Waters) coupled to a Waters Synapt G2-S mass spectrometer (Pade et al.,  
830 2017). The Synapt G2-S instrument was operated in data-independent mode with ion-  
831 mobility separation as an additional dimension of separation (referred to as HDMS<sup>E</sup>). Single  
832 measurements of the four biological replicates of the total extract, the soluble fraction and the  
833 membrane-enriched fraction were carried out, while pooled samples of the debris fraction  
834 were measured in triplicate.

835 Progenesis QI for Proteomics version 4.1 (Nonlinear Dynamics, Newcastle upon Tyne, UK)  
836 was used for raw data processing, protein identification and label free quantification. Proteins  
837 were quantified by the absolute quantification Hi3 method using Hi3 Phos B Standard  
838 (Waters) as reference (Silva et al. 2006). Results were given as fmol on column. Proteins  
839 identified in one fraction by at least two unique peptides were included in the quantitative  
840 analysis. Protein abundance changes between salt-acclimated and control cells by a factor of  
841 at least 1.5, accompanied by ANOVA *p*-values < 0.05 were regarded as significant. To  
842 determine a combined fold change value for the total extract and the three subcellular  
843 fractions, first a weighted fold change value for the three subcellular fractions was calculated  
844 by summing up the corresponding protein amounts (measured as fmol on column) and  
845 dividing the value from salt-acclimated cells by the value from controls. Since the debris  
846 fraction contained only a minor part of about 10% of the total protein, the protein amounts of  
847 the debris fraction were divided by ten. In a second step, the final combined fold change  
848 value was calculated as the average of the weighted fold change from the subcellular  
849 fractions and the fold change of the total extract.

850 A detailed description of the proteome method can be found in the Supplementary Material.  
851 The mass spectrometry proteomics data have been deposited to the ProteomeXchange  
852 Consortium via the PRIDE (Vizcaíno et al., 2013) partner repository with the dataset identifier  
853 PXD026118 and 10.6019/PXD026118. Data are available via ProteomeXchange with



854 identifier PXD026118 (Reviewer account details: Username:  
855 reviewer\_pxd026118@ebi.ac.uk; Password: NjhSNM7Z).

### 856 **Metabolomic methods**

857 Low molecular mass compounds were extracted from cells with ethanol (80%, HPLC grade,  
858 Roth, Germany) at 65°C for 2 h. The soluble sugars were analyzed by gas-liquid  
859 chromatography using a defined amount of sorbitol as internal standard as described by  
860 Hagemann et al. (2008). Other metabolites were analyzed by LC-MS/MS using the high-  
861 performance liquid chromatograph mass spectrometer system LCMS-8050 (Shimadzu,  
862 Japan). One microgram of carnitine was added per sample as internal standard for LC-  
863 MS/MS analyses. The dry extracts were dissolved in 200 µl MS-grade water and filtered  
864 through 0.2 µm filters (Omnifix®-F, Braun, Germany). The cleared supernatants were  
865 separated on a pentafluorophenylpropyl (PFPP) column (Supelco Discovery HS FS, 3 µm,  
866 150 x 2.1 mm) with a mobile phase containing 0.1% formic acid. The compounds were eluted  
867 at a rate of 0.25 ml min<sup>-1</sup> using the following gradient: 1 min 0.1% formic acid, 95% water, 5%  
868 acetonitrile, within 15 min linear gradient to 0.1% formic acid, 5% distilled water, 95%  
869 acetonitrile, 10 min 0.1% formic acid, 5% distilled water, 95% acetonitrile. Aliquots were  
870 continuously injected in the MS/MS part and ionized via electrospray ionization (ESI). The  
871 compounds were identified and quantified using the multiple reaction monitoring (MRM)  
872 values given in the LC-MS/MS method package and the LabSolutions software package  
873 (Shimadzu, Japan). The metabolites were determined as relative metabolite abundances  
874 (fold changes), which were calculated after normalization of signal intensity to that of the  
875 internal standard carnitine.

### 876 **ACKNOWLEDGEMENTS**

877 The technical assistance of Klaudia Michl (University of Rostock) is acknowledged.

### 878 **FUNDING INFORMATION**

879 Funded by the German research Foundation (DFG) - "SCyCode" research group FOR 2816  
880 (DFG ID 397695561) to MH and WRH, individual grant KL 3114/2-1 to SK, and the Research  
881 Training Group "MeInBio" GRK2344 (DFG ID 322977937) to MR. The LC-MS/MS equipment  
882 at University of Rostock was financed through the HBFUG program (GZ: INST 264/125-1  
883 FUGG).

884 **AUTHOR CONTRIBUTION**

885 MH designed the study. SK, MR, JG & WRH performed and evaluated the transcriptomic  
886 analyses. SM performed and evaluated the proteome experiments. MH performed and  
887 evaluated the metabolome analyses. MH, WRH, SK & SM wrote the manuscript.

888 **CONFLICT of INTEREST**

889 The authors declare no conflicts of interest.

890 **References**

- 891 Aikawa S, Nishida A, Hasunuma T, Chang JS, Kondo A (2019) Short-term temporal  
892 metabolic behavior in halophilic cyanobacterium *Synechococcus* sp. strain PCC 7002  
893 after salt shock. *Metabolites* 9: 297
- 894 Azad AK, Sato R, Ohtani K, Sawa Y, Ishikawa T, Shibata H (2011) Functional  
895 characterization and hyperosmotic regulation of aquaporin in *Synechocystis* sp. PCC  
896 6803. *Plant Sci* 180: 375–382
- 897 Beuf L, Bédu S, Durand MC, Joset F (1994) A protein involved in co-ordinated regulation of  
898 inorganic carbon and glucose metabolism in the facultative photoautotrophic  
899 cyanobacterium *Synechocystis* PCC6803. *Plant Mol Biol* 25: 855-864
- 900 Billis K, Billini M, Tripp HJ, Kyripides NC, Mavromatis K. 2014. Comparative transcriptomics  
901 between *Synechococcus* PCC 7942 and *Synechocystis* PCC 6803 provide insights  
902 into mechanisms of stress acclimation. *PLoS One* 9: e109738.
- 903 Bolay P, Muro-Pastor MI, Francisco J Florencio FJ, Klähn S (2018) The distinctive  
904 regulation of cyanobacterial glutamine synthetase. *Life* 8: 52
- 905 Cheung KJ, Badarinarayana V, Selinger DW, Janse D, Church GM (2003) A microarray-  
906 based antibiotic screen identifies a regulatory role for supercoiling in the osmotic  
907 stress response of *Escherichia coli*. *Genome Res* 13: 206-215
- 908 Chisti Y (2013) Constraints to commercialization of algal fuels. *J Biotech* 167: 201–214
- 909 Clarkson J, Campbell ID, Yudkin MD (2004) Efficient regulation of sigmaF, the first  
910 sporulation-specific sigma factor in *B. subtilis*. *J Mol Biol* 342: 1187–1195
- 911 Cui J, Sun T, Chen L, Zhang W (2020) Engineering salt tolerance of photosynthetic  
912 cyanobacteria for seawater utilization. *Biotechnol Adv* 43: 107578

- 913 Cui J, Sun T, Chen L, Zhang W (2021) Salt-tolerant *Synechococcus elongatus* UTEX 2973  
914 obtained via engineering of heterologous synthesis of compatible solute  
915 glucosylglycerol. *Front Microbiol* 12: 650217
- 916 Dorman CJ, Dorman MJ (2016) DNA supercoiling is a fundamental regulatory principle in the  
917 control of bacterial gene expression. *Biophys Rev* 8: 209-220
- 918 Dühning U, Axmann IM, Hess WR, Wilde A (2006) An internal antisense RNA regulates  
919 expression of the photosynthesis gene *isiA*. *Proc Natl Acad Sci USA* 103: 7054-7058
- 920 Eisenhut M, Georg J, Klähn S, Sakurai I, Mustila H, Zhang P, Hess WR, Aro EM (2012) The  
921 antisense RNA *As1\_flv4* in the cyanobacterium *Synechocystis* sp. PCC 6803  
922 prevents premature expression of the *flv4-2* operon upon shift in inorganic carbon  
923 supply. *J Biol Chem* 287: 33153–33162
- 924 Elanskaya IV, Karandashova IV, Bogachev AV, Hagemann M (2002) Functional analysis of  
925 the  $\text{Na}^+/\text{H}^+$  antiporter encoding genes of the cyanobacterium *Synechocystis* PCC  
926 6803. *Biochemistry (Moscow)* 67: 432-440
- 927 Fulda S, Mikkat S, Huang F, Huckauf J, Marin K, Norling B, Hagemann M (2006) Proteome  
928 analysis of salt stress response in the cyanobacterium *Synechocystis* sp. strain PCC  
929 6803. *Proteomics* 6: 2733-2745
- 930 Galmozzi CV, Florencio FJ, Muro-Pastor MI (2016) The cyanobacterial ribosomal-associated  
931 protein LrtA is involved in post-stress survival in *Synechocystis* sp PCC 6803. *PLoS*  
932 *One* 11: e0159346
- 933 Gao L, Wang J, Ge H, Fang L, Zhang Y, Huang X, Wang Y (2015a) Toward the complete  
934 proteome of *Synechocystis* sp. PCC 6803. *Photosynth Res* 126: 203-219
- 935 Gao L, Ge H, Huang X, Liu K, Zhang Y, Xu W, Wang Y (2015b) Systematically ranking the  
936 tightness of membrane association for peripheral membrane proteins (PMPs). *Mol*  
937 *Cell Proteomics* 14: 340-353
- 938 Gao F, Zhao J, Chen L, Battchikova N, Ran Z, Aro EM, Ogawa T, Ma W (2016) The NDH-  
939 1L-PSI supercomplex is important for efficient cyclic electron transport in  
940 cyanobacteria. *Plant Phys* 172: 1451–1464
- 941 Georg J, Dienst D, Schürgers N, Wallner T, Kopp D, Stazic D, et al. (2014) The small  
942 regulatory RNA *SyR1/PsrR1* controls photosynthetic functions in cyanobacteria. *Plant*  
943 *Cell* 26: 3661–3679
- 944 Georg J, Kostova G, Vurijoki L, Schön V, Kadowaki T, Huokko T, et al. 2017. Acclimation of  
945 oxygenic photosynthesis to iron starvation is controlled by the sRNA *IsaR1*. *Curr Biol*  
946 27: 1425-1436

- 947 Georg J, Hess WR (2018) Wide-spread antisense transcription in prokaryotes. *Microbiol*  
948 *Spectrum* 6: RWR-0029-2018
- 949 Grigorieva G, Shestakov S. 1982. Transformation in the cyanobacterium *Synechocystis* sp.  
950 6803. *FEMS Microbiol Lett* 13: 367-370
- 951 Gärtner K, Klähn S, Watanabe S, Mikkat S, Scholz I, Hess WR, Hagemann M (2019)  
952 Cytosine N4-methylation via M.Ssp6803II is involved in the regulation of transcription,  
953 fine-tuning of DNA replication and DNA repair in the cyanobacterium *Synechocystis*  
954 sp. PCC 6803. *Front Microbiol* 10: 1233
- 955 Hagemann M, Fulda S, Schubert H (1994) DNA, RNA and protein synthesis in the  
956 cyanobacterium *Synechocystis* sp. PCC 6803 adapted to different salt  
957 concentrations. *Curr Microbiol* 28: 201-207
- 958 Hagemann M, Schoor A, Jeanjean R, Zuther E, Joset F (1997) The *stpA* gene form  
959 *Synechocystis* sp. strain PCC 6803 encodes the glucosylglycerol-phosphate  
960 phosphatase involved in cyanobacterial osmotic response to salt shock. *J Bacteriol*  
961 179: 1727–1733
- 962 Hagemann M, Jeanjean R, Fulda S, Havaux M, Erdmann N (1999) Flavodoxin accumulation  
963 contributes to enhanced cyclic electron flow around photosystem I in salt-stressed  
964 cells of *Synechocystis* sp. PCC 6803. *Physiol Plant* 105: 670-678
- 965 Hagemann M, Ribbeck-Busch K, Klähn S, Hasse D, Steinbruch R, Berg G (2008) The plant-  
966 associated bacterium *Stenotrophomonas rhizophila* expresses a new enzyme for the  
967 synthesis of the compatible solute glucosylglycerol. *J Bacteriol* 190: 5898-5906
- 968 Hagemann M (2011) Molecular biology of cyanobacterial salt acclimation. *FEMS Microbiol*  
969 *Rev* 35: 87–123
- 970 Hagemann M, Hess WR (2018) Systems and synthetic biology for the biotechnological  
971 application of cyanobacteria. *Curr Opin Biotech* 49: 94-99
- 972 Hagemann M, Song S, Brouwer EM (2021) Inorganic carbon assimilation in cyanobacteria:  
973 Mechanisms, regulation, and engineering. In Hudson P, Lee SY, Nielsen J (eds.)  
974 *Cyanobacteria Biotechnology*, Wiley-Blackwell Biotechnology Series, Chapter 1, 1-31.
- 975 Hernandez-Prieto MA, Futschik ME (2012) CyanoEXpress: A web database for exploration  
976 and visualisation of the integrated transcriptome of cyanobacterium *Synechocystis* sp.  
977 PCC6803. *Bioinformatics* 8: 634-638
- 978 Hein, S., Scholz, I., Voß, B., and Hess, W. R. (2013). Adaptation and modification of three  
979 CRISPR loci in two closely related cyanobacteria. *RNA Biol* 10: 852–864

- 980 Huang F, Fulda S, Hagemann M, Norling B (2006) Proteomic screening of salt-stress-  
981 induced changes in plasma membranes of *Synechocystis* sp. strain PCC 6803.  
982 *Proteomics* 6: 910-920
- 983 Iijima H, Nakaya Y, Kuwahara A, Hirai MY, Osanai T (2015) Seawater cultivation of  
984 freshwater cyanobacterium *Synechocystis* sp. PCC 6803 drastically alters amino acid  
985 composition and glycogen metabolism. *Front Microbiol* 6: 326
- 986 Jablonsky J, Papacek S, Hagemann M (2016) Different strategies of metabolic regulation in  
987 cyanobacteria: from transcriptional to biochemical control. *Sci Rep* 6: 33024
- 988 Kaneko T, Sato S, Kotani H, Tanaka A, Asamizu E, Nakamura Y, et al. (1996) Sequence  
989 analysis of the genome of the unicellular cyanobacterium *Synechocystis* sp. strain  
990 PCC6803. II. Sequence determination of the entire genome and assignment of  
991 potential protein-coding regions (supplement). *DNA Res* 3: 185–209
- 992 Kanesaki Y, Suzuki I, Allakhverdiev SI, Mikami K, Murata N (2002) Salt stress and  
993 hyperosmotic stress regulate the expression of different sets of genes in  
994 *Synechocystis* sp. PCC 6803. *Biochem Biophys Res Commun* 290: 339-348
- 995 Khan RI, Wang Y, Afrin S, Wang B, Liu Y, Zhang X, Chen L, Zhang W, He L, Ma G (2016)  
996 Transcriptional regulator PrqR plays a negative role in glucose metabolism and  
997 oxidative stress acclimation in *Synechocystis* sp. PCC 6803. *Sci Rep* 6: 32507
- 998 Kizawa A, Kawahara A, Takashima K, Takimura Y, Nishiyama Y, Hihara Y (2017) The LexA  
999 transcription factor regulates fatty acid biosynthetic genes in the cyanobacterium  
1000 *Synechocystis* sp. PCC 6803. *Plant J* 92: 189-198
- 1001 Klähn S, Steglich C, Hess WR, Hagemann M (2010a) Glucosylglycerate: a secondary  
1002 compatible solute common to marine cyanobacteria from nitrogen-poor environments.  
1003 *Environ Microbiol* 12: 83-94
- 1004 Klähn S, Höhne A, Simon E, Hagemann M (2010b) The gene *ss3076* encodes a protein  
1005 mediating the salt-induced expression of *ggpS* for the biosynthesis of the compatible  
1006 solute glucosylglycerol in *Synechocystis* sp. strain PCC 6803. *J Bacteriol* 192: 4403-  
1007 4412
- 1008 Klähn S, Schaal C, Georg J, Baumgartner D, Knippen G, Hagemann M, et al. (2015) The  
1009 sRNA NsiR4 is involved in nitrogen assimilation control in cyanobacteria by targeting  
1010 glutamine synthetase inactivating factor IF7. *Proc Natl Acad Sci USA* 112: E6243-  
1011 E6252

- 1012 Kirsch F, Pade N, Klähn S, Hess WR, Hagemann M (2017) The glucosylglycerol degrading  
1013 enzyme GghA is involved in the acclimation to fluctuating salinities of the  
1014 cyanobacterium *Synechocystis* sp. strain PCC 6803. *Microbiology* 163: 1319-1328
- 1015 Kirsch F, Klähn S, Hagemann M (2019) Salt-regulated accumulation of the compatible  
1016 solutes sucrose and glucosylglycerol in cyanobacteria and its biotechnological  
1017 relevance. *Front Microbiol* 10: 2139
- 1018 Koksharova O, Schubert M, Shestakov S, Cerff R (1998) Genetic and biochemical evidence  
1019 for distinct key functions of two highly divergent GAPDH genes in catabolic and  
1020 anabolic carbon flow of the cyanobacterium *Synechocystis* sp. PCC 6803. *Plant Mol*  
1021 *Biol* 36: 183-194
- 1022 Kondo K, Geng XX, Katayama M, Ikeuch M (2005). Distinct roles of CpcG1 and CpcG2 in  
1023 phycobilisome assembly in the cyanobacterium *Synechocystis* sp. PCC 6803.  
1024 *Photosynth Res* 84: 269–273
- 1025 Kopf M, Klähn S, Scholz I, Matthiessen JK, Hess WR, Voß B (2014) Comparative analysis of  
1026 the primary transcriptome of *Synechocystis* sp. PCC 6803. *DNA Res* 21: 527-539
- 1027 Kopf M, Hess WR (2015) Regulatory RNAs in photosynthetic cyanobacteria. *FEMS Microbiol*  
1028 *Rev* 39: 301–315
- 1029 Kumar L, Futschik ME (2007) Mfuzz: a software package for soft clustering of microarray  
1030 data. *Bioinformatics* 2: 5-7
- 1031 Lei H, Chen G, Wang Y, Ding Q, Wei D (2014) SII0528, a site-2-protease, is critically  
1032 involved in cold, salt and hyperosmotic stress acclimation of cyanobacterium  
1033 *Synechocystis* sp PCC 6803. *Int J Mol Sci* 15: 22678-22693
- 1034 Levina N, Totemeyer S, Stokes NR, Louis P, Jones MA, Booth IR (1999) Protection of  
1035 *Escherichia coli* cells against extreme turgor by activation of MscS and MscL  
1036 mechanosensitive channels: identification of genes required for MscS activity. *EMBO*  
1037 *J* 18: 1730-1737
- 1038 Li H, Singh AK, McIntyre LM, Sherman LA (2004) Differential gene expression in response to  
1039 hydrogen peroxide and the putative PerR regulon of *Synechocystis* sp. strain PCC  
1040 6803. *J Bacteriol* 186: 3331-3345
- 1041 Liu Y, Beyer A, Aegersold R (2016) On the dependency of cellular protein levels on mRNA  
1042 abundance. *Cell* 165: 535-550
- 1043 Liu X, Miao R, LindbergP, Lindblad P (2019a) Modular engineering for efficient  
1044 photosynthetic biosynthesis of 1-butanol from CO<sub>2</sub> in cyanobacteria. *Energy Environ*  
1045 *Sci* 12: 2765-2777

- 1046 Liu H, Weis, DA, Zhang MM, Cheng M, Zhang B, Zhang H, Gerstenecker GS, Pakrasi HB,  
1047 Gross ML, Blankenship RE (2019b) Phycobilisomes harbor FNR L in cyanobacteria.  
1048 *mBio* 10: e00669-19
- 1049 Marin K, Zuther E, Kerstan T, Kunert A, Hagemann M (1998) The *ggpS* gene from  
1050 *Synechocystis* sp. strain PCC 6803 encoding glucosyl-glycerol-phosphate synthase is  
1051 involved in osmolyte synthesis. *J Bacteriol* 180: 4843–4849
- 1052 Marin K, Huckauf J, Fulda S, Hagemann M (2002) Salt-dependent expression of  
1053 glucosylglycerol-phosphate synthase, involved in osmolyte synthesis in the  
1054 cyanobacterium *Synechocystis* sp. strain PCC 6803. *J Bacteriol* 184: 2870–2877
- 1055 Marin K, Suzuki I, Yamaguchi K, Ribbeck K, Yamamoto H, Kanesaki Y, Hagemann M,  
1056 Murata N (2003) Identification of histidine kinases that act as sensors in the  
1057 perception of salt stress in *Synechocystis* sp. PCC 6803. *Proc Natl Acad Sci USA*  
1058 100: 9061-9066
- 1059 Marin K, Kanesaki Y, Los DA, Murata N, Suzuki I, Hagemann M (2004) Gene expression  
1060 profiling reflects physiological processes in salt acclimation of *Synechocystis* sp.  
1061 strain PCC 6803. *Plant Physiol* 136: 3290–3300
- 1062 Matsushashi A, Tahara H, Ito Y, Uchiyama J, Ogawa S, Ohta H (2015) Slr2019, lipid A  
1063 transporter homolog, is essential for acidic tolerance in *Synechocystis* sp PCC6803.  
1064 *Photosynth Res* 125: 267-277
- 1065 Mikkat S, Hagemann M (2000) Molecular analysis of the *ggtBCD* operon of *Synechocystis*  
1066 sp. strain PCC 6803 encoding the substrate-binding protein and the transmembrane  
1067 proteins of an ABC transporter. *Arch Microbiol* 174: 273-282
- 1068 Mikkat S, Milkowski C, Hagemann M (2000) The gene *slI0273* of the cyanobacterium  
1069 *Synechocystis* sp. strain PCC 6803 encodes a protein essential for growth at low  
1070  $\text{Na}^+/\text{K}^+$  ratios. *Plant Cell Environm* 23: 549-559
- 1071 Mitschke J, Georg J, Scholz I, Sharma CM, Dienst D, Bantscheff J, et al. (2011) An  
1072 experimentally anchored map of transcriptional start sites in the model  
1073 cyanobacterium *Synechocystis* sp. PCC6803. *Proc Natl Acad Sci USA* 108: 2124–  
1074 2129
- 1075 Novak JF, Stirnberg M, Roenneke B, Marin K (2011) A novel mechanism of osmosensing, a  
1076 salt-dependent protein-nucleic acid interaction in the cyanobacterium *Synechocystis*  
1077 Species PCC 6803. *J Biol Chem* 286: 3235-3241

- 1078 Nowaczyk MM, Krause K, Mieseler M, Sczibilanski A, Ikeuchi M, Rögner M (2012) Deletion  
1079 of *psbJ* leads to accumulation of Psb27-Psb28 photosystem II complexes in  
1080 *Thermosynechococcus elongatus*. *Biochim Biophys Acta* 1817: 1339-1345
- 1081 Pade N, Compaoré J, Klähn S, Stal LJ, Hagemann M (2012) The marine cyanobacterium  
1082 *Crocospaera watsonii* WH8501 synthesizes the compatible solute trehalose by a  
1083 laterally acquired OtsAB fusion protein. *Environ Microbiol* 14: 1261-1271
- 1084 Pade N, Hagemann M (2014) Salt acclimation of cyanobacteria and their application in  
1085 biotechnology. *Life* 5: 25-49
- 1086 Pade N, Michalik D, Ruth W, Belkin N, Hess WR, Berman-Frank I, Hagemann M (2016)  
1087 Trimethylated homoserine functions as the major compatible solute in the globally  
1088 significant oceanic cyanobacterium *Trichodesmium*. *Proc Natl Acad Sci USA* 113:  
1089 13191-13196
- 1090 Pade N, Mikkat S, Hagemann M (2017) Ethanol, glycogen and glucosylglycerol represent  
1091 competing carbon pools in ethanol-producing cells of *Synechocystis* sp. PCC 6803  
1092 under high-salt conditions. *Microbiology* 163: 300-307
- 1093 Pappesch R, Warnke P, Mikkat S, Normann J, Wisniewska-Kucper A, Huschka F, Wittmann  
1094 M, Khani A, Schwengers O, Oehmcke-Hecht S, Hain T, Kreikemeyer B, Patenge N.  
1095 (2017) The regulatory small RNA *marS* supports virulence of *Streptococcus*  
1096 *pyogenes*. *Sci Rep* 7: 12241
- 1097 Pattanayak GK, Liao Y, Wallace EWJ, Budnik B, Drummond DA, Rust MJ (2020) Daily  
1098 cycles of reversible protein condensation in cyanobacteria. *Cell Rep* 32: 108032
- 1099 Pereira SB, Santos M, Leite JP, Flores C, Einfeld C, Büttel Z, Mota R, Rossi F, De Philippis  
1100 R, Gales L, Morais-Cabral JH, Tamagnini P (2019) The role of the tyrosine kinase  
1101 Wzc (Slr0923) and the phosphatase Wzb (Slr0328) in the production of extracellular  
1102 polymeric substances (EPS) by *Synechocystis* PCC 6803. *Microbiol open* 8: e00753
- 1103 Perozo E, Kloda A, Cortes DM, Martinac B. (2001) Site-directed spin-labeling analysis of  
1104 reconstituted MscL in the closed state. *J Gen Physiol* 118: 193-206
- 1105 Pinto FL, Thapper A, Sontheim W, Lindblad P (2009) Analysis of current and alternative  
1106 phenol based RNA extraction methodologies for cyanobacteria. *BMC Mol Biol* 10: 79
- 1107 Prakash JS, Sinetova M, Zorina A, Kupriyanova E, Suzuki I, Murata N, Los DA (2009) DNA  
1108 supercoiling regulates the stress-inducible expression of genes in the cyanobacterium  
1109 *Synechocystis*. *Mol Biosyst* 5: 1904-1912
- 1110 Qiao J, Huang S, Te R, Wang J, Chen L, Zhang W (2013) Integrated proteomic and  
1111 transcriptomic analysis reveals novel genes and regulatory mechanisms involved in



- 1112 salt stress responses in *Synechocystis* sp. PCC 6803. *Appl Microbiol Biotechnol* 97:  
1113 8253–8264
- 1114 Qiao Y, Wang W, Lu X (2020) Engineering cyanobacteria as cell factories for direct trehalose  
1115 production from CO<sub>2</sub>. *Metab Eng* 62: 161-171
- 1116 Reed RH, Borowitzka LJ, Mackay MA, Chudek JA, Foster R, Warr SRC, et al. (1986) Organic  
1117 solute accumulation in osmotically stressed cyanobacteria. *FEMS Microbiol Lett* 39:  
1118 51–56
- 1119 Reed RH, Stewart WDP (1985) Osmotic adjustment and organic solute accumulation in  
1120 unicellular cyanobacteria from freshwater and marine habitats. *Mar Biol* 88: 1–9
- 1121 Riediger M, Kadowaki T, Nagayama R, Georg J, Hihara Y, Hess WR (2019)  
1122 Biocomputational analyses and experimental validation identify the regulon controlled  
1123 by the redox-responsive transcription factor RpaB. *iScience* 15: 316-331
- 1124 Riediger M, Spät P, Bilger R, Voigt K, Macek B, Hess WR (2021) Analysis of a  
1125 photosynthetic cyanobacterium rich in internal membrane systems via gradient  
1126 profiling by sequencing (Grad-seq). *Plant Cell* 33: 248-269
- 1127 Ritter SPA, Lewis AC, Vincent SL, Lo LL, Cunha APA, Chamot D, Ensminger I, Espie GS,  
1128 Owttrim GW (2020) Evidence for convergent sensing of multiple abiotic stresses in  
1129 cyanobacteria. *Biochim Biophys Acta Gen Subj* 1864: 129462
- 1130 Rüksam H, Kirsch F, Reimann V, Erban A, Kopka J, Hagemann M, Hess WR, Klähn S  
1131 (2018) The iron-stress activated RNA 1 (IsaR1) coordinates osmotic acclimation and  
1132 iron starvation responses in the cyanobacterium *Synechocystis* sp. PCC 6803.  
1133 *Environ Microbiol* 20: 2757-2768
- 1134 Sakurai I, Stazic D, Eisenhut M, Vuorio E, Steglich C, Hess WR, Aro EM (2012) Positive  
1135 regulation of *psbA* gene expression by cis-encoded antisense RNAs in *Synechocystis*  
1136 sp. PCC 6803. *Plant Physiol* 160: 1000–1010
- 1137 Scholz I, Lange SJ, Hein S, Hess WR, Backofen R (2013) CRISPR-Cas systems in the  
1138 cyanobacterium *Synechocystis* sp. PCC6803 exhibit distinct processing pathways  
1139 involving at least two Cas6 and a Cmr2 protein. *PLoS One* 8: e56470
- 1140 Schwarz D, Orf I, Kopka J, Hagemann M (2013) Recent applications of metabolomics toward  
1141 cyanobacteria. *Metabolites* 3: 72-100
- 1142 Shcolnick S, Shaked Y, Keren N (2007) A role for *mrgA*, a DPS family protein, in the internal  
1143 transport of Fe in the cyanobacterium *Synechocystis* sp. PCC6803. *Biochim Biophys*  
1144 *Acta* 1767: 814-819

- 1145 Shapiguzov A, Lyukevich AA, Allakhverdiev SI, Sergeyenko TV, Suzuki I, Murata N, Los DA  
1146 (2005) Osmotic shrinkage of cells of *Synechocystis* sp. PCC 6803 by water efflux via  
1147 aquaporins regulates osmotic stress-inducible gene expression. *Microbiology* 151: 447-  
1148 455
- 1149 Shi L, Bischoff KM, Kennelly PJ (1999) The *icfG* gene cluster of *Synechocystis* sp. strain  
1150 PCC 6803 encodes an Rsb/Spo-like protein kinase, protein phosphatase, and two  
1151 phosphoproteins. *J Bacteriol* 181: 4761-4767
- 1152 Shoumskaya MA, Paithoonrangsarit K, Kanasaki Y, Los DA, Zinchenko VV, Tanticharoen M,  
1153 Suzuki I, Murata N (2005) Identical Hik-Rre systems are involved in perception and  
1154 transduction of salt signals and hyperosmotic signals but regulate the expression of  
1155 individual genes to different extents in *Synechocystis*. *J Biol Chem* 280: 21531-21538
- 1156 Silva JC, Gorenstein MV, Li GZ, Vissers JPC, Geromanos SJ (2006) Absolute  
1157 quantification of proteins by LCMSE: A virtue of parallel MS acquisition. *Mol Cell*  
1158 *Proteomics* 5: 144-156
- 1159 Spät P, Barske T, Maček B, Hagemann M (2021) Alterations in the CO<sub>2</sub> availability induce  
1160 alterations in the phospho-proteome of the cyanobacterium *Synechocystis* sp. PCC  
1161 6803. *New Phytol* 231: 1123-1137
- 1162 Stanier RY, Kunisawa R, Mandel M, Cohen-Bazire G (1971) Purification and properties of  
1163 unicellular blue-green algae (order *Chroococcales*). *Bacteriol Rev* 35: 171–205
- 1164 Stokes NR, Murray HD, Subramaniam C, Gourse RL, Louis P, Bartlett W, Miller S, Booth IR  
1165 (2003) A role for mechanosensitive channels in survival of stationary phase:  
1166 regulation of channel expression by RpoS. *Proc Natl Acad Sci USA* 100: 15959-  
1167 15964
- 1168 Summerfield TC, Sherman LA (2008) Global transcriptional response of the alkali-tolerant  
1169 cyanobacterium *Synechocystis* sp. strain PCC 6803 to a pH 10 environment. *Appl*  
1170 *Environ Microbiol* 74: 5276-5284
- 1171 Takashima K, Nagao S, Kizawa A, Suzuki T, Dohmae N, Hihara Y (2020) The role of  
1172 transcriptional repressor activity of LexA in salt-stress responses of the  
1173 cyanobacterium *Synechocystis* sp. PCC 6803. *Sci Rep* 10: 17393
- 1174 Toyoshima M, Tokumaru Y, Matsuda F, Shimizu H (2020) Assessment of protein content  
1175 and phosphorylation level in *Synechocystis* sp. PCC 6803 under various growth  
1176 conditions using quantitative phosphoproteomic analysis. *Molecules* 25: E3582

- 1177 Tyystjärvi T, Huokko T, Rantamäki S, Tyystjärvi E (2013) Impact of different group 2 sigma  
1178 factors on light use efficiency and high salt stress in the cyanobacterium  
1179 *Synechocystis* sp. PCC 6803. *PLoS One* 8: e63020
- 1180 Uchiyama J, Asakura R, Moriyama A, Kubo Y, Shibata Y, Yoshino Y, Tahara H, Matsushashi  
1181 A, Sato S, Nakamura Y, Tabata S, Ohta H (2014) SII0939 is induced by Slr0967 in  
1182 the cyanobacterium *Synechocystis* sp. PCC6803 and is essential for growth under  
1183 various stress conditions. *Plant Physiol Biochem* 81: 36-43
- 1184 Vinnemeier J, Hagemann M (1999) Identification of salt-regulated genes in the genome of  
1185 the cyanobacterium *Synechocystis* sp. strain PCC 6803 by subtractive RNA  
1186 hybridization. *Arch Microbiol* 172: 377-386
- 1187 Vizcaíno JA, Cote´ RG, Csordas A, Dianes JA, Fabregat A, Foster JM, Griss J, Alpi E, Birim  
1188 M, Contell J, et al. (2013) The Proteomics Identifications (PRIDE) database and  
1189 associated tools: status in 2013. *Nucl Acid Res* 41: D1063–D1069
- 1190 Wang HL, Postier BL, Burnap RL (2002) Polymerase chain reaction-based mutageneses  
1191 identify key transporters belonging to multigene families involved in Na<sup>+</sup> and pH  
1192 homeostasis of *Synechocystis* sp. PCC 6803. *Mol Microbiol* 44: 1493-1506
- 1193 Wegener KM, Singh AK, Jacobs JM, Elvitigala T, Welsh EA, Keren N, Gritsenko MA, Ghosh  
1194 BK, Camp DG 2nd, Smith RD, et al. (2010) Global proteomics reveal an atypical  
1195 strategy for carbon/nitrogen assimilation by a cyanobacterium under diverse  
1196 environmental perturbations. *Mol Cell Proteomics* 9: 2678-2689
- 1197 Whitton BA, Potts M (2000) The ecology of cyanobacteria. Their diversity in time and space.  
1198 Kluwer Academic Publishers, Dordrecht, The Netherlands
- 1199 Wu W, Du W, Gallego RP, Hellingwerf KJ, van der Woude AD, Branco Dos Santos F (2020)  
1200 Using osmotic stress to stabilize mannitol production in *Synechocystis* sp. PCC6803.  
1201 *Biotechnol Biofuels* 13: 117
- 1202 Zhan J, Steglich C, Scholz I, Hess WR, Kirilovsky D (2021) Inverse regulation of light  
1203 harvesting and photoprotection mediated by a 3'end-derived sRNA in cyanobacteria.  
1204 *Plant Cell* 33: 358-380
- 1205 Zuther E, Schubert H, Hagemann M. 1998. Mutation of a gene encoding a putative  
1206 glycoprotease leads to reduced salt tolerance, altered pigmentation, and cyanophycin  
1207 accumulation in the cyanobacterium *Synechocystis* sp. strain PCC 6803. *J Bacteriol*  
1208 180: 1715-1722
- 1209

1210 **Figures and Legends**

1211

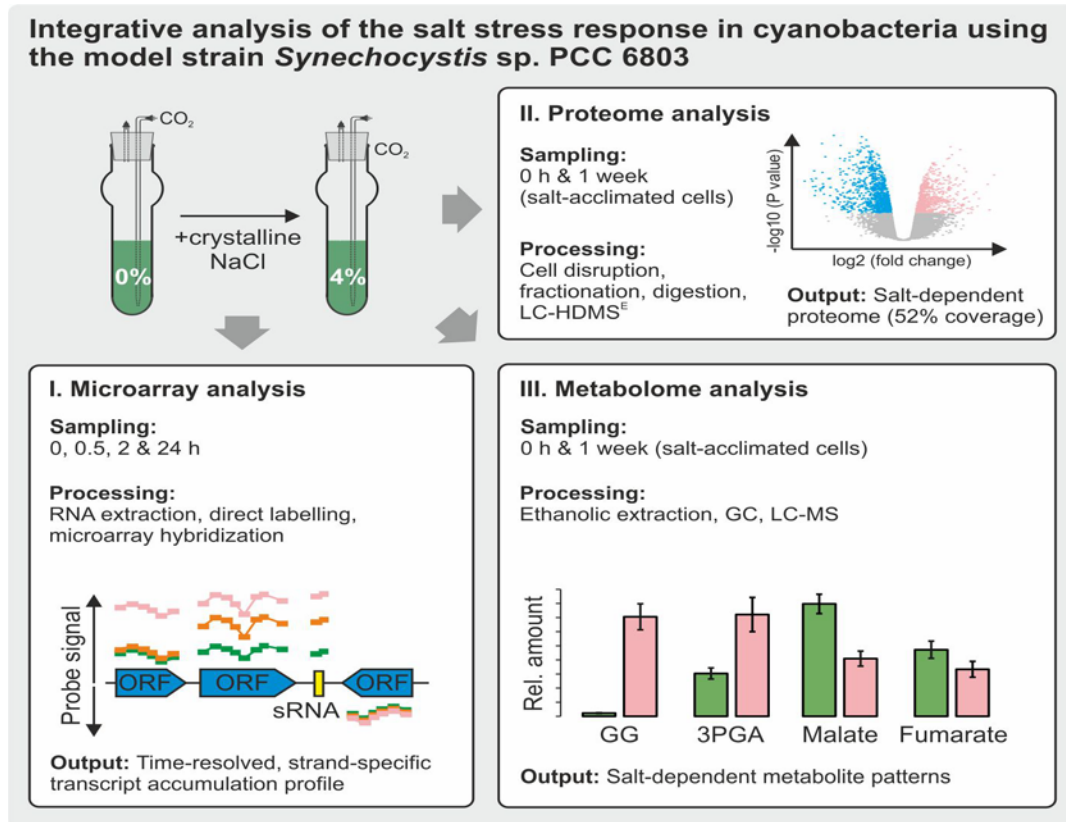

1212

1213 **Figure 1. Overview on the applied approaches and conditions.** Samples for microarray,  
1214 proteome, and metabolome analyses were taken from cultures sparked with CO<sub>2</sub>-enriched  
1215 air (5 %[v/v]). Sampling points for each experiment are given in the panels. Further details  
1216 about cultivation, salt treatment and sample processing are given in the Materials & Methods  
1217 section.

1218

1219

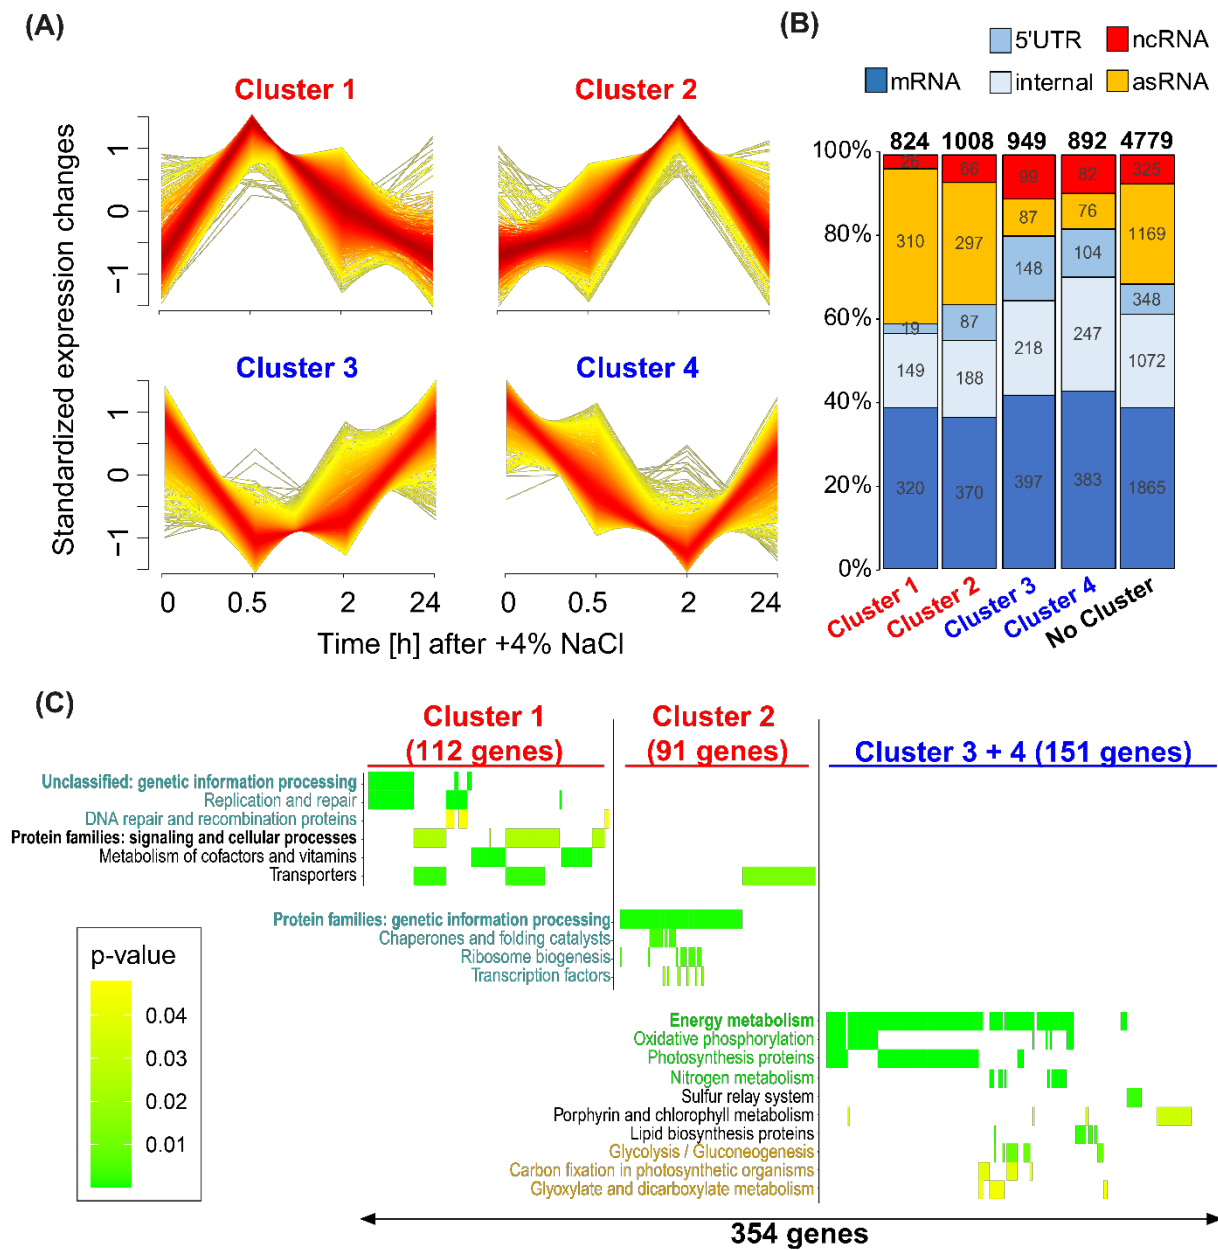

1220

1221 **Figure 2. Cluster analysis of the salt stress microarray time series.** A. Four major  
 1222 clusters of co-regulated transcripts were obtained. B. Distribution of different transcript types  
 1223 over the different clusters (see Suppl. Table S2 for the precise values and assignments). C:  
 1224 Functional enrichment analysis of proteins encoded by differentially regulated mRNAs  
 1225 according to KEGG Orthology (KO) terms for each cluster. Heatmap coloring represents the  
 1226 enrichment p-values (y axis = enriched KO terms, x axis = genes, see Suppl. Table S3 for  
 1227 detailed information).

1228

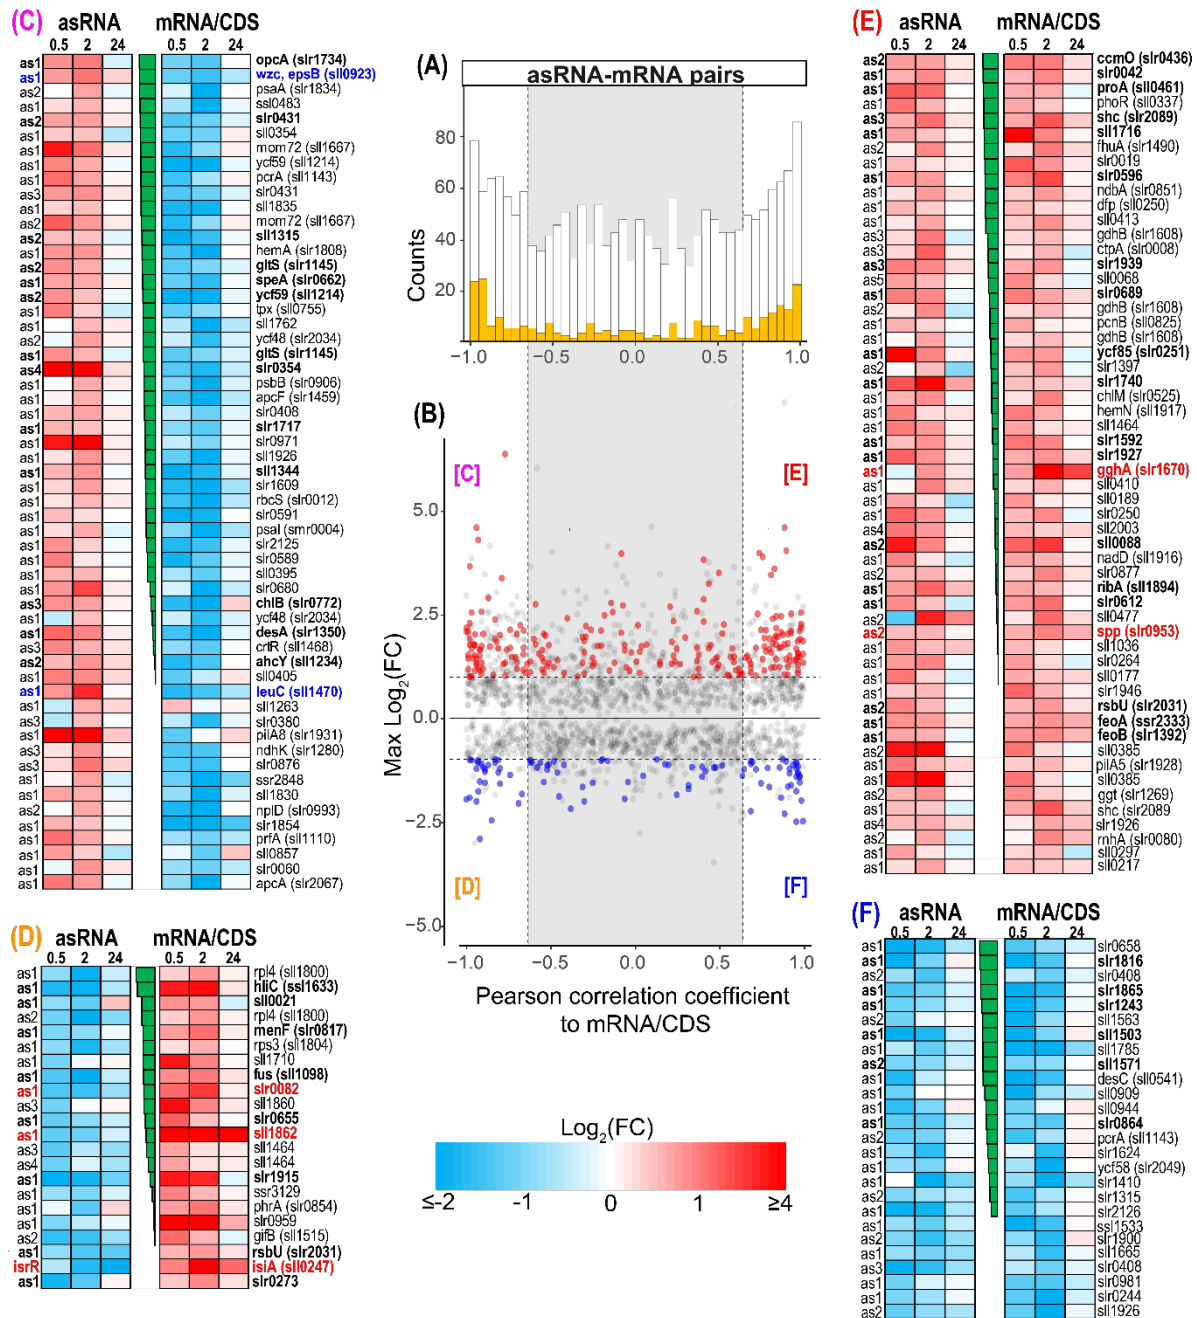

1229

1230

1231

1232

1233

1234

1235

1236

1237

1238

1239

1240

1241

1242

**Figure 3. Comparison of salt-regulated mRNA:asRNA pairs with inverse or similar induction patterns.** **A.** Histogram of Pearson correlation coefficients for expression profiles of all detected asRNA/mRNA pairs. Highlighted are asRNA/mRNA pairs, which both were assigned to an expression cluster with significant differential expression at least at one-time point. **B.** Scatterplot of maximum absolute log<sub>2</sub> fold changes for every asRNA vs. Pearson correlation coefficients to its cognate mRNA. Colored points show the expression cluster assignment for the respective asRNA (red = cluster 1 + 2; blue = cluster 3 + 4). White backgrounds indicate strong correlation between asRNA/mRNA pairs (either ≥0.65 or ≤-0.65). Numbers of individual cluster assignments for asRNA/mRNA pairs are indicated in the boxes. **C.** 57 pairs were asRNA-induced and mRNA-repressed, **D.** 22 pairs were asRNA-repressed and mRNA-induced, **E.** 56 pairs were asRNA- and mRNA-induced, **F.** 26 pairs were asRNA- and mRNA-repressed. Only asRNA/mRNA pairs are given, which both were assigned to an expression cluster with a Pearson correlation coefficient of either ≥0.65 or ≤-

1243 0.65 at least at one-time point. The heat maps illustrate the  $\log_2(\text{FC})$  at the individual  
1244 measurements from the microarray experiments for asRNAs (left) and mRNAs (right). The  
1245 heatmaps are sorted according to Pearson correlation coefficient (center). Examples that are  
1246 mentioned in the text are highlighted based on their expression. Bold font indicates at least  
1247 two significant differential expression measurements per transcript. Details of the  
1248 asRNA/mRNA analysis are given in Suppl. Table S4.

1249

1250

1251

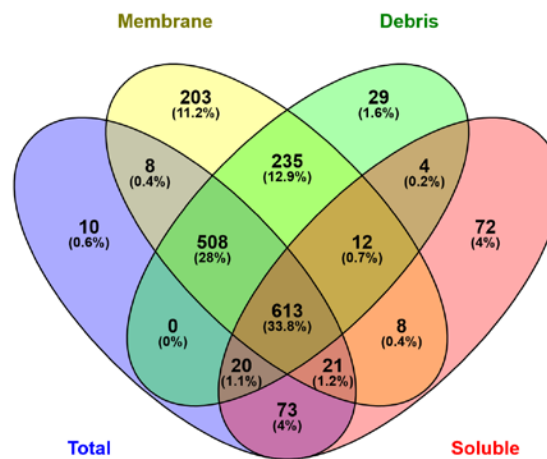

1252

1253 **Figure 4. Overlap of the proteome among the different protein fractions.** Venn diagram  
1254 showing numbers and percentages of identified proteins in the total protein extract and in the  
1255 subcellular fractions of debris, soluble or membrane proteins.

1256

1257

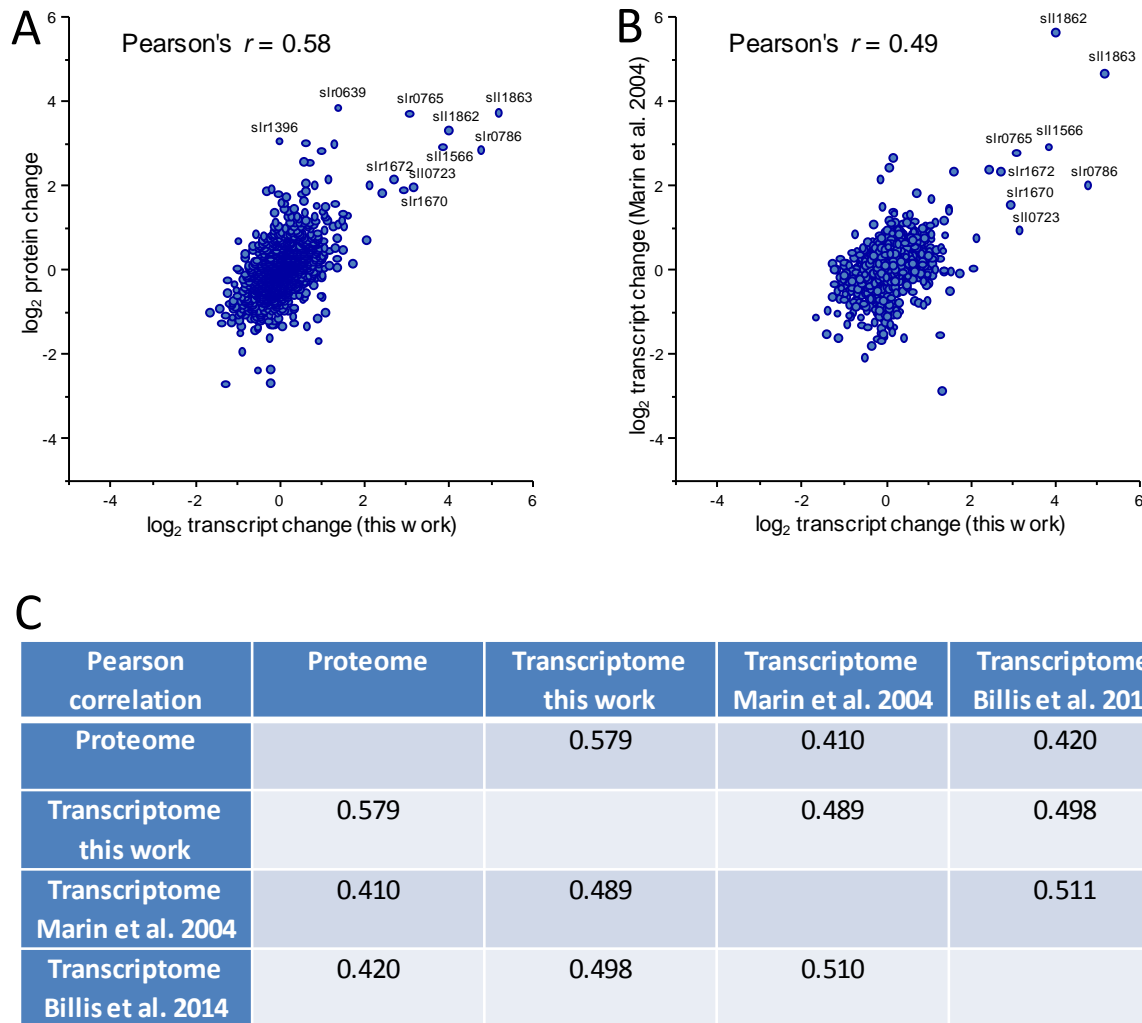

1258

1259 **Figure 5. Correlation between transcriptome (24 h) and proteome (7 d) dynamics in**  
 1260 **response to high salt conditions. A.** Data originate from the present study. **B.** The newly  
 1261 obtained proteome data were compared with the previous transcriptomic study (Marin et al.,  
 1262 2004). Scatterplots display the correlation of protein and transcript ratios. 1749 transcripts  
 1263 with reported fold changes could be mapped to corresponding changes in protein  
 1264 abundances. Matches with ratio differences below  $\log_2$  1.5-fold changes were considered to  
 1265 be similar. **C.** Table displaying Person's correlation coefficients between the different data  
 1266 sets.

1267



1268

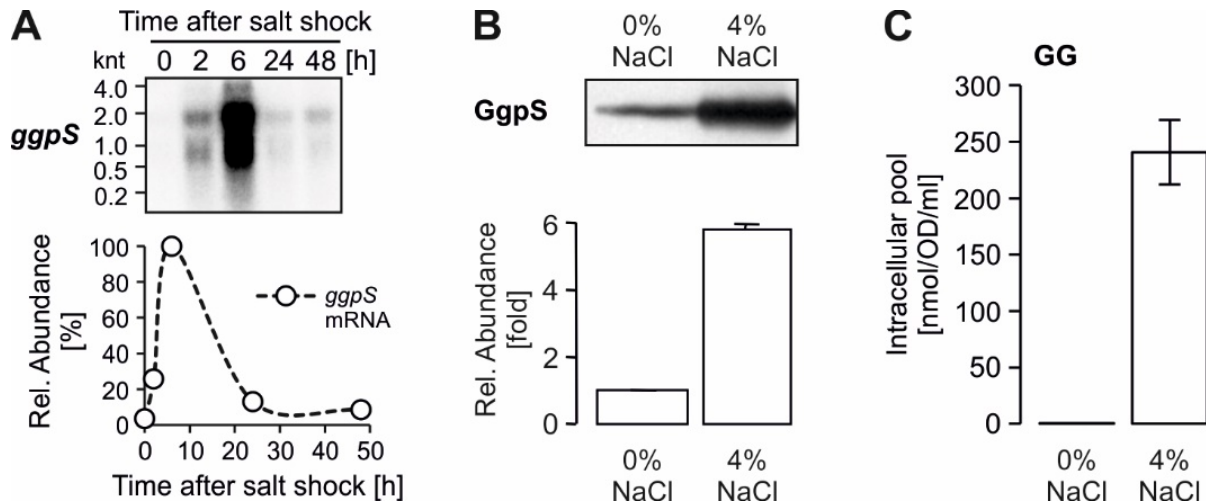

1269

1270 **Figure 6. Salt-dependent up-regulation of the GG synthesis key enzyme, GG-**  
1271 **phosphate synthase (GgpS).** **A.** Northern-blot showing accumulation kinetics of the *ggpS*  
1272 transcript in response to salt shock of 4 % [w/v] NaCl. Relative abundances were calculated  
1273 after densitometric evaluation of the blot signals (signal obtained for 6 h was set as  
1274 maximum, 100%). **B.** Western blot confirming increased GgpS abundance in cells acclimated  
1275 to 4% NaCl. Relative abundance was calculated after densitometric evaluation of blot signals  
1276 (signal from control cells was set as 1). Data are the mean  $\pm$  SD of values obtained from  
1277 three individual blots. **C.** Intracellular accumulation of GG in cells acclimated for 7 days to 4%  
1278 NaCl. Data are the mean  $\pm$  SD of 6 replicates.

1279

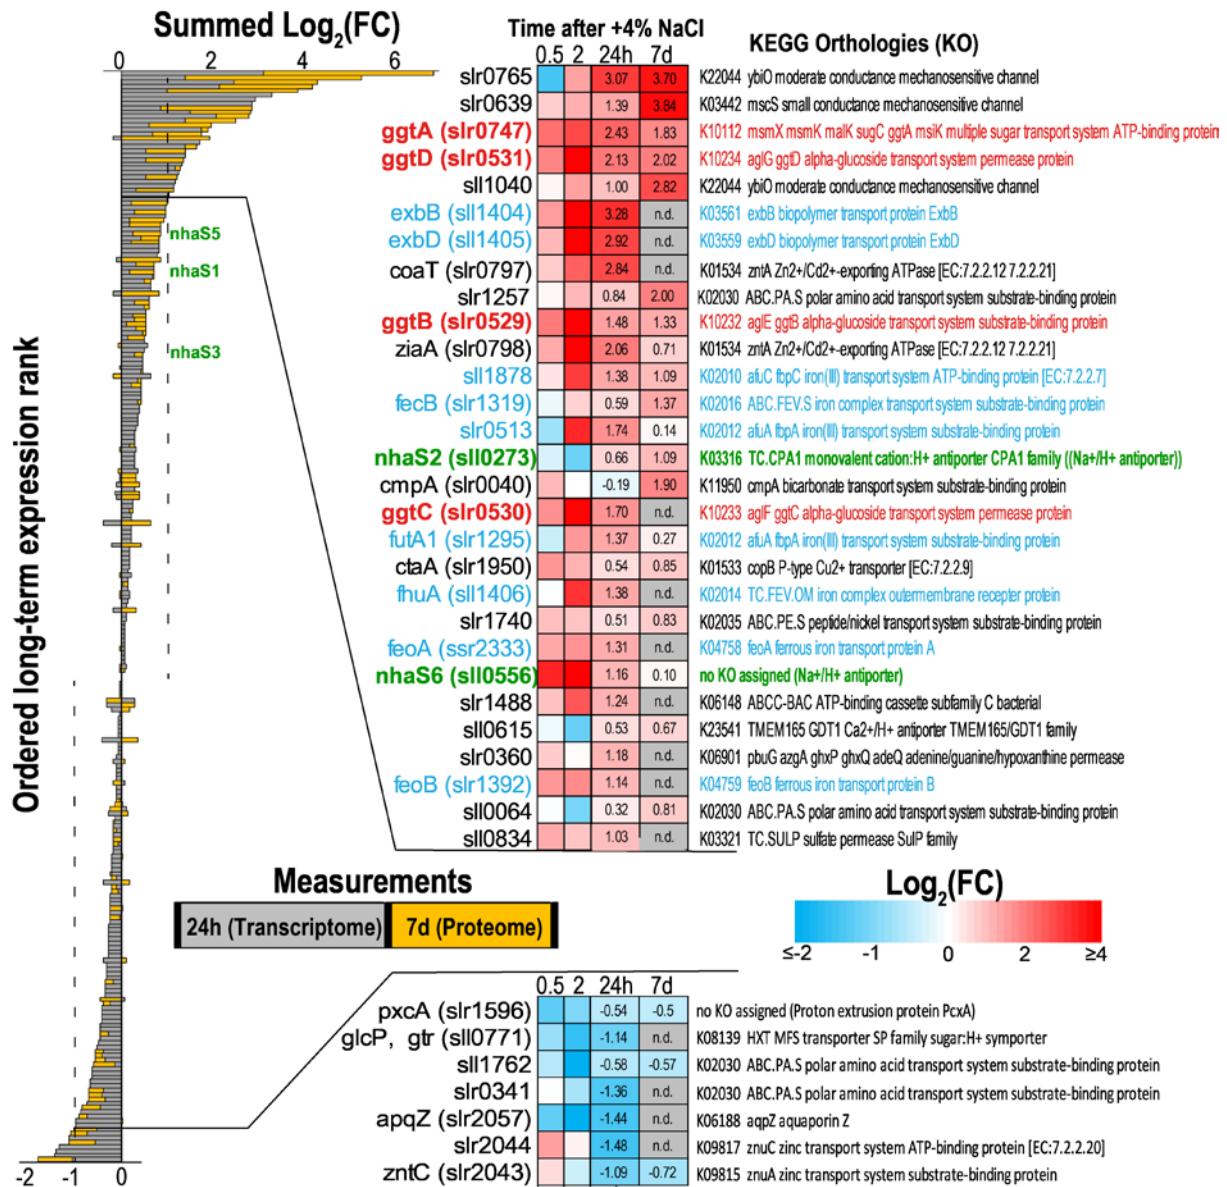

1280

1281 **Figure 7. Ordered long-term expression ranks for transport-related genes.** Ranks are  
 1282 ordered according to the summed Log<sub>2</sub>(FC) from the 24 h (transcriptome) and 7 d  
 1283 (proteome) measurements of salt-acclimated cells vs. control cells. The heatmaps on the  
 1284 right illustrate the log<sub>2</sub>(FC) at the individual measurements from the microarray experiment  
 1285 (0.5, 2, and 24 h) and proteome measurements (7 d) for the top ranked transport related  
 1286 genes. Highlighted in Red = compatible solute transport (*ggtABCD*); Blue = related to iron  
 1287 transport, Green = *nhaS* genes (Na<sup>+</sup>/H<sup>+</sup> antiporter). Detailed information is provided in Suppl.  
 1288 Table S9.

1289

1290

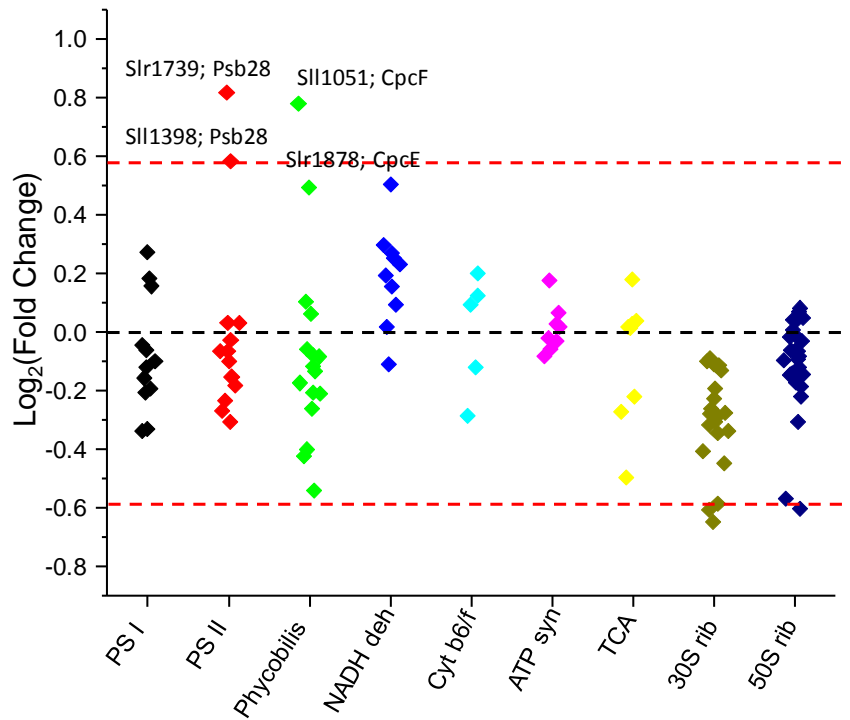

1291

1292 **Figure 8. Influence of the salinity on basic cellular processes.** Log<sub>2</sub> fold change values  
1293 (salt-acclimated/control) from the identified protein components of the indicated processes  
1294 are plotted vertically aligned.

1295

1296

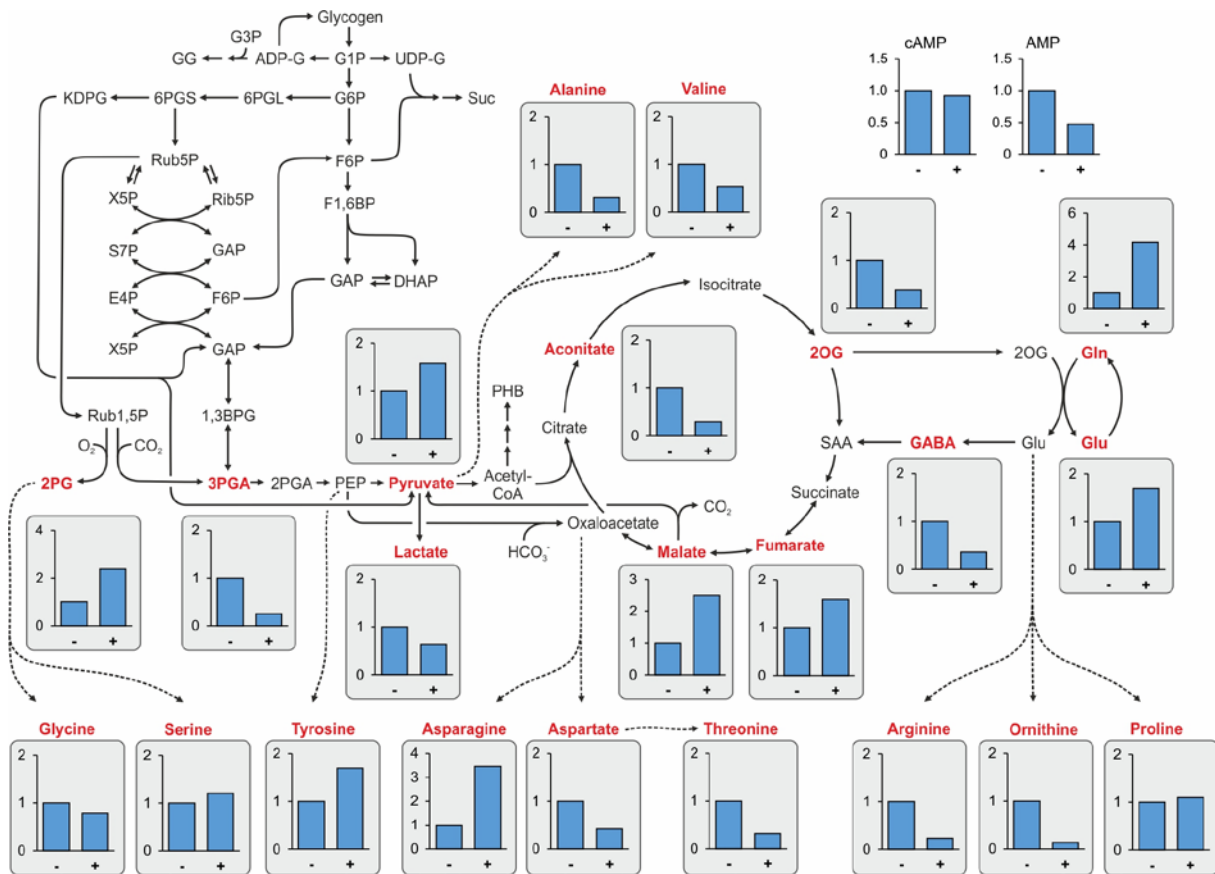

1297

1298 **Figure 9. Alterations in the central carbon and nitrogen metabolism.** Low molecular  
 1299 mass compounds were isolated from cells of *Synechocystis* 6803 grown in NaCl-free BG11  
 1300 medium or medium supplemented with 4% NaCl for 7 days. LC-MS/MS was used to estimate  
 1301 the relative levels (Y axis show fold changes, amount in cells from 0% NaCl cultivation (-) set  
 1302 to 1 and relative level at 4% NaCl (+) is shown) of central metabolites as part of primary  
 1303 carbon and nitrogen metabolism. Shown are mean values from three biological replicates  
 1304 (details in Suppl. Table S10). Dotted arrows indicate that several enzymes are necessary to  
 1305 convert one metabolite into the other. The alteration in the compatible solute GG is shown in  
 1306 Fig. 6.

1307

1308 **Tables and Legends**

1309

1310 **Table 1. Global analysis of protein-coding genes showing altered transcript levels**  
 1311 **after salt shock of 684 mM NaCl.** A gene was regarded as induced or repressed if the log<sub>2</sub>  
 1312 fold change was higher or lower than 1 or -1 (*P* value < 0.05; n.a. – not analyzed).

|                      | Time after salt shock | Marin et al., 2004 | Billis et al., 2014 | this study |
|----------------------|-----------------------|--------------------|---------------------|------------|
| up-regulated mRNAs   | 0.5 h                 | 652                | n.a.                | 382        |
|                      | 2 h                   | 477                | n.a.                | 458        |
|                      | 24 h                  | 48                 | 133                 | 87         |
| down-regulated mRNAs | 0.5 h                 | 329                | n.a.                | 407        |
|                      | 2 h                   | 268                | n.a.                | 574        |
|                      | 24 h                  | 48                 | 368                 | 31         |

1313

1314 **Table 2. Expression of proteins involved in compatible solute metabolism and**  
 1315 **transport** (given are log<sub>2</sub> fold changes of their levels in cells exposed for 7 d (proteome) or  
 1316 24 h (transcriptome) to 684 mM NaCl versus control cells; \*according to Cluster analysis  
 1317 shown in Fig. 2).

| Gene           | Protein function                                   | Proteome | Transcriptome | Cluster* |
|----------------|----------------------------------------------------|----------|---------------|----------|
| <i>slI1566</i> | Glucosylglycerol-phosphate synthase (GGPS)         | 2.92     | 3.85          | 2        |
| <i>slr0746</i> | Glucosylglycerol-phosphate phosphatase (GGP-P)     | 1.19     | 1.48          | 2        |
| <i>slI1085</i> | Glycerol-3-phosphate dehydrogenase (GlpD)          | 2.55     | 0.71          | 2        |
| <i>slr1672</i> | Glycerol kinase (GlpK)                             | 2.14     | 2.71          | 2        |
| <i>slr0747</i> | ATP-binding subunit of GG transporter (GgtA)       | 1.83     | 2.43          | 2        |
| <i>slr0529</i> | Substrate-binding subunit of GG transporter (GgtB) | 1.33     | 1.48          | 2        |
| <i>slr0531</i> | Integral membrane protein of GG transporter (GgtD) | 2.02     | 2.13          | 2        |
| <i>slr1670</i> | Glucosylglycerol degrading enzyme (GghA)           | 1.89     | 2.95          | 2        |
| <i>slI0045</i> | Sucrose-phosphate synthase (Sps)                   | 1.22     | 0.46          | 2        |
| <i>slr0953</i> | Sucrose-phosphate phosphatase (Spp)                | 1.04     | 1.26          | 2        |

1318

1319

1320

1321 **Table 3. Salt-regulated proteins that are involved in general stress tolerance.** Given are  
 1322 log<sub>2</sub> fold changes of their protein and corresponding mRNA levels in cells exposed for  
 1323 different times to 684 mM NaCl versus control cells.

| Gene           | Protein function                                          | Proteome | Transcriptome |       |       |
|----------------|-----------------------------------------------------------|----------|---------------|-------|-------|
|                |                                                           | 7 d      | 24 h          | 2 h   | 0.5 h |
| <i>sll1863</i> | Unknown protein                                           | 3.73     | 5.18          | 7.47  | 7.49  |
| <i>sll1862</i> | Unknown function                                          | 3.30     | 4.00          | 5.28  | 5.30  |
| <i>sll1037</i> | Putative component of TRAP transporter                    | 3.01     | 0.63          | 0.17  | 0.38  |
| <i>slr0750</i> | Light-independent protochlorophyllide reductase subunit N | 3.00     | 1.29          | -1.88 | -0.86 |
| <i>slr0786</i> | Methionine aminopeptidase B                               | 2.83     | 4.77          | 5.32  | 0.95  |
| <i>slr0967</i> | Hypothetical protein, involved in stress responses        | 2.43     | 3.00          | 3.28  | 0.27  |
| <i>Sll0528</i> | Putative zinc metalloprotease                             | 2.43     | 4.19          | 6.22  | 1.61  |
| <i>sll7064</i> | CRISPR-Cas system 2                                       | 2.18     | 0.57          | -2.56 | -1.00 |
| <i>sll0248</i> | Flavodoxin (IsiB)                                         | 2.15     | 1.15          | 4.27  | 0.89  |
| <i>sll1988</i> | 33 kDa chaperonin (HSP33)                                 | 2.06     | 0.42          | 0.21  | 0.35  |
| <i>sll0947</i> | Light-repressed protein A, LrpA                           | 1.83     | -1.69         | -2.54 | 0.84  |
| <i>slr2019</i> | Putative ATP binding subunit of ABC transporter           | 1.79     | 2.13          | -0.33 | -0.11 |
| <i>slr1894</i> | General stress protein MrgA/Dps                           | 0.94     | 1.06          | 2.09  | 1.16  |
| <i>sll1514</i> | 16.6 kDa small heat shock protein, molecular chaperon     | -1.68    | 0.91          | 5.85  | 4.25  |

1324

1325 **Table 4. Salt effects on proteins involved in central carbon metabolism** (given are log<sub>2</sub>  
 1326 fold changes of their levels in cells exposed for 7 d (proteome) or 24 h (transcriptome) to 684  
 1327 mM NaCl versus control cells)

| Gene           | Protein function                                 | Proteome | Transcriptome |
|----------------|--------------------------------------------------|----------|---------------|
| <i>slr0394</i> | Phosphoglycerate kinase                          | 0.76     | 0.58          |
| <i>slr0884</i> | Glyceraldehyde-3-phosphate dehydrogenase 1, Gap1 | 0.75     | 1.35          |
| <i>sll0842</i> | Neopullulanase, NpIT                             | 1.28     | 0.83          |
| <i>slr0237</i> | Glycogen debranching enzyme 1, GlgX1             | 1.16     | 1.13          |
| <i>slr1857</i> | Glycogen debranching enzyme 2, GlgX2             | -1.12    | -1.12         |
| <i>slr1367</i> | Alpha-1,4 glucan phosphorylase                   | 0.61     | 0.81          |
| <i>sll1356</i> | Glycogen phosphorylase 2, GlgP2                  | 0.08     | 0.53          |
| <i>sll0587</i> | Pyruvate kinase 1 (PK 1)                         | 0.76     | 0.60          |
| <i>sll1275</i> | Pyruvate kinase 2 (PK 2)                         | -0.45    | -0.78         |
| <i>slr0301</i> | Phosphoenolpyruvate synthase                     | -1.19    | -0.97         |

1328

1329
